1 Title: **Evidence of an additional center of apple domestication in Iran,**  
2 **with contributions from the Caucasian crab apple *Malus orientalis***

3

4 **Running head: Apple domestication in the Caucasus**

5

6 Bina Hamid<sup>1</sup>, Yousefzadeh Hamed<sup>2</sup>, Venon Anthony<sup>3</sup>, Remoué Carine<sup>3</sup>, Rousselet Agnès<sup>3</sup>,  
7 Falque Matthieu<sup>3</sup>, Shadab Faramarzi<sup>4</sup>, Xilong Chen<sup>3</sup>, Jarkyn Samanchina<sup>5</sup>, David Gill<sup>5</sup>, Akylai  
8 Kabaeva<sup>5</sup>, Giraud Tatiana<sup>6</sup>, Hossainpour Batool<sup>7</sup>, Abdollahi Hamid<sup>8</sup>, Gabrielyan Ivan<sup>9</sup>,  
9 Nersesyan Anush<sup>10</sup>, Cornille Amandine<sup>3</sup>

10

11 <sup>1</sup> Department of Forestry, Tarbiat Modares University, Noor, Iran

12 <sup>2</sup> Department of Environmental science, Biodiversity Branch, Natural resources faculty, Tarbiat

13 Modares University, Noor, Iran

14 <sup>3</sup> Université Paris-Saclay, INRAE, CNRS, AgroParisTech, GQE - Le Moulon, 91190 Gif-sur-

15 Yvette, France

16 <sup>4</sup> Department of Plant Production and Genetics, Faculty of Agriculture, Razi University,

17 Kermanshah, Iran

18 <sup>5</sup> Fauna & Flora International, Cambridge, UK

19 <sup>6</sup> Ecologie Systematique Evolution, Universite Paris-Saclay, CNRS, AgroParisTech, Orsay,

20 France

21 <sup>7</sup> Iranian Research Organization for Science and Technology (IROST), Institute of Agriculture,

22 Department of Agriculture, Tehran, Iran

23 <sup>8</sup> Temperate Fruits Research Center, Horticultural Sciences Research Institute, Agricultural

24 Research, Education and Extension Organization (AREEO), Karaj, Iran

25 <sup>9</sup> Department of Conservation of Genetic Resources of Armenian Flora, A. Takhtajyan Institute

26 of Botany, Armenian National Academy of Sciences, Acharyan Str.1, 0040 Yerevan, Armenia

27 <sup>10</sup> Department of Palaeobotany, A. Takhtajyan Institute of Botany, Armenian National Academy

28 of Sciences, Acharyan Str.1, 0040 Yerevan, Armenia

29

30 Corresponding authors: [amandine.cornille@universite-paris-saclay.fr](mailto:amandine.cornille@universite-paris-saclay.fr),

31 [hamed.yousefzadeh@modares.ir](mailto:hamed.yousefzadeh@modares.ir)

32

33 Key words: apple, Caucasus, crop-wild gene flow, domestication, fruit tree, climate,  
34 introgression.

35 **Abstract**

36 Anthropogenic and natural divergence processes in crop-wild fruit tree complexes are less  
37 studied than in annual crops, especially in the Caucasus, a pivotal region for plant domestication.  
38 We investigated anthropogenic and natural divergence processes in apples in the Caucasus using  
39 26 microsatellite markers amplified in 550 wild and cultivated samples. We found two distinct  
40 cultivated populations in Iran, that were both genetically differentiated from *Malus domestica*,  
41 the standard cultivated apple worldwide. Coalescent-based inferences using approximate  
42 Bayesian computation showed that these two cultivated populations originated from specific  
43 domestication events in Iran. One of the Iranian clusters encompassed both cultivated and forest  
44 trees, suggesting that either farmers use of local wild apple for cultivation or that some forest  
45 trees represent feral cultivars. We found evidence of substantial wild-to-crop, crop-crop and crop-  
46 to-wild gene flow in the Caucasus, as has been previously described in apple in Europe and in  
47 fruit trees in general. In the Caucasus, we identified seven genetically differentiated populations  
48 of wild apple (*Malus orientalis*). Niche modeling combined with genetic diversity estimates  
49 indicated that these populations likely resulted from range changes during the last glaciation. This  
50 study identifies Iran as a key region in the evolution and domestication of apple and further  
51 demonstrates the role of wild-to-crop gene flow during fruit tree domestication. Our results  
52 support the view that domestication of fruit trees was likely a geographically diffuse and  
53 protracted process, involving multiple, geographically disparate, origins of domestication. We  
54 also highlight the impact of climate change on the natural divergence of a wild fruit tree and  
55 provides a base for apple conservation and breeding programs in the Caucasus.

56

57

58

59

## 60 **Introduction**

61 Crop-wild complexes provide good models for understanding how anthropogenic and natural  
62 factors shape population divergence in the presence of gene flow. Indeed, crops are the result of a  
63 recent anthropogenic divergence process, *i.e.*, domestication, which began around 10,000 years  
64 ago, and which has often been followed by subsequent crop-wild gene flow (Besnard, Terral, &  
65 Cornille, 2018; Brandenburg et al., 2017; Chen et al., 2019; Cornille, Giraud, Smulders, Roldán-  
66 Ruiz, & Gladieux, 2014; Cornille et al., 2012; Diez et al., 2015; Flowers et al., 2019; Gaut, Díez,  
67 & Morrell, 2015). Conversely, wild species allow the study of natural divergence over a longer  
68 timescale. Indeed, wild species have often undergone shifts in their distribution following past  
69 climate changes associated with glacial periods, and range contraction has often led to population  
70 differentiation and divergence (Excoffier, Foll, & Petit, 2009; Hewitt, 1990; Hewitt, 1996;  
71 Jezkova, Olah-Hemmings, & Riddle, 2011; Petit, Bialozyt, Garnier-Géré, & Hampe, 2004;  
72 Schmitt, 2007). Understanding the evolutionary processes shaping the natural and anthropogenic  
73 divergence of crop-wild complexes is not just an academic exercise: it will also help assess the  
74 future status of wild resources. Because of the socio-economic importance of crop plants,  
75 protecting the wild relatives of crops, beyond the need for preserving biodiversity (Bacles &  
76 Jump, 2011), will allow us to manage the genetic resources for future breeding strategies in the  
77 face of global changes (*e.g.*, climate change, emerging diseases) (Bailey-Serres, Parker,  
78 Ainsworth, Oldroyd, & Schroeder, 2019; Castañeda-Álvarez et al., 2016; H. Zhang, Mittal,  
79 Leamy, Barazani, & Song, 2017).

80 Fruit trees present several historical and biological features that make them fascinating  
81 models for investigating anthropogenic and natural divergence with gene flow. Several fruit tree  
82 crops are spread across the world and are sometimes found in sympatry with their wild relatives  
83 (Besnard et al., 2018; Cornille et al., 2019, 2014; Liu et al., 2019). Fruit trees are also  
84 characterized by high levels of gene flow during divergence, which is to be expected considering  
85 the typical life history traits of trees (Cornille et al., 2013; Cornille, Gladieux, & Giraud, 2013a;  
86 Oddou-Muratorio & Klein, 2008; Petit & Hampe, 2006). Population genetics studies of natural  
87 divergence processes associated with the last glacial maximum in Europe, North America and  
88 Asia in wind-dispersed trees (*e.g.*, *Abies*, *Pinus*, *Fraxinus*, *Quercus*, *Betula* (Lascoux, Palmé,  
89 Cheddadi, & Latta, 2004; Petit et al., 2004)) and animal-dispersed trees (Cornille et al., 2013a)  
90 showed that there were high levels of gene flow between populations and that trees had high

91 dispersal capabilities. These studies also located single (Bai & Spitkovsky, 2010; Tian, Li, Ji,  
92 Zhang, & Luo, 2009; Zeng et al., 2011) or multiple (Qiu, Wang, Liu, Shen, & Tang, 2011; Tian  
93 et al., 2009) glacial refugia where most temperate tree species persisted during the last glacial  
94 maximum, and from which populations recolonized higher or lower latitudes during the Holocene  
95 post-glacial expansion (Giesecke, Brewer, Finsinger, Leydet, & Bradshaw, 2017). Population  
96 genetics and genomics studies also revealed the prominent role of gene flow during the  
97 anthropogenic divergence of fruit trees. Domestication of several emblematic fruit tree crops such  
98 as grape and apple occurred with substantial crop-crop and wild-crop gene flow and without a  
99 bottleneck (Arroyo-García et al., 2006; Cornille et al., 2012; Decroocq et al., 2016; Diez et al.,  
100 2015; Duan et al., 2017; Liu et al., 2019; Meyer, Duval, & Jensen, 2012; Myles et al., 2011).  
101 These studies thus revealed that fruit tree domestication displays different patterns from those of  
102 annuals, with for example milder bottlenecks, which can be explained by the long lifespan, long  
103 juvenile phase and self-incompatibility system of trees (Fuller, 2018; Gaut et al., 2015).  
104 However, studies of natural and anthropogenic divergence processes in crop-wild fruit tree  
105 complexes are still scarce in the geographic regions that were pivotal in the divergence history of  
106 these complexes.

107         The Caucasus ecoregion harbors a remarkable concentration of both economically  
108 important plants and their wild relatives, in particular wheat, rye, barley and also fruit trees  
109 including walnut, apricot and apple (Asanidze, Akhalkatsi, Henk, Richards, & Volk, 2014a;  
110 Gabrielian & Zohary, 2004; Vavilov, 1926, 1992; Yousefzadeh, Hosseinzadeh Colagar, Tabari,  
111 Sattarian, & Assadi, 2012). This region covers Georgia, Armenia, Azerbaijan, the North  
112 Caucasian part of the Russian Federation, the northeastern part of Turkey and the Hyrcanian  
113 Mixed Forests region in northwestern Iran (Nakhutsrishvili, Zazanashvili, Batsatsashvili, &  
114 Montalvo, 2015; Zazanashvili et al., 2020). Two Pleistocene refugia for temperate plants are  
115 recognized in this region (Bina, Yousefzadeh, Ali, & Esmailpour, 2016; Yousefzadeh et al.,  
116 2012): the Colchis refugium in the catchment basin of the Black Sea (in the Western Caucasus),  
117 and the Hyrcanian refugium at the southern edge of the Caspian Sea. Glacial refugia are known to  
118 harbor higher levels of species and genetic diversity (Hewitt, 2004), and this is the case for the  
119 Colchis and Hyrcanian refugia. The geography of the Caucasus, with two parallel mountain  
120 chains separated by contrasted climatic zones, makes this region a good model for investigating  
121 the natural divergence processes associated with the last glacial maximum. Furthermore, it has

122 been suggested that Iran, with its close proximity to Central Asia - the center of origin of  
123 emblematic fruit trees - and its historic position on the Silk Trade Routes, is a possible secondary  
124 center of domestication of apple, grape and apricot (Decroocq et al., 2016; Liang et al., 2019; Liu  
125 et al., 2019). However, inferences of the natural and anthropogenic divergence history of wild-  
126 crop fruit tree complexes in the Caucasus have been limited by the small number of samples  
127 (Decroocq et al., 2016; Liu et al., 2019) and/or genetic markers investigated so far  
128 (Amirchakhmaghi et al., 2018; Asanidze, Akhalkatsi, Henk, Richards, & Volk, 2014b; Cornille et  
129 al., 2013a; Gharghani et al., 2010; Myles et al., 2011; Volk & Cornille, 2019; Vouillamoz et al.,  
130 2006).

131 The Caucasian crab apple, *Malus orientalis* Uglitzk., is an endemic wild apple species  
132 occurring in the Caucasus. More specifically, it is found in the Western Caucasus (*i.e.*, the  
133 southern part of Russia, northern Anatolia and northwestern Turkey), Georgia, Armenia, the  
134 mountainous belt in northern Iran, the Hyrcanian Forests (Büttner, 2001; Rechinger, 1964) and  
135 the Zagros forests in eastern and central Iran (Browicz, 1969; Rechinger, 1964) (Figure 1). This  
136 species displays high phenotypic diversity across its distribution range where it occurs as  
137 scattered individuals in natural forests or at high altitude in rocky mountains (Fischer & Schmidt,  
138 1938; Rechinger, 1964). It has a high resistance to pests and diseases (Büttner, 2001) and its fruit,  
139 of high quality, are variable in size (2-4 cm) and color (green to yellowish) (Cornille et al., 2014).  
140 Fruit of *M. orientalis* are harvested across the Caucasus for stewing and processed as juice and  
141 other beverages (cider, wine), jelly, syrup, jam, and vinegar (Amirchakhmaghi et al., 2018;  
142 Büttner, 2001). This has led some authors to suggest that some local apple cultivars from several  
143 regions of the Caucasus originated from *M. orientalis* (Forsline, Aldwinckle, Dickson, Luby, &  
144 Hokanson, 2003; Langenfeld, 1991; Schmitt, 2007). Other studies also suggested that *M.*  
145 *orientalis* has been present and cultivated in Iran long before the *M. domestica* trees were  
146 introduced (Gharghani et al., 2009; Gharghani et al., 2010; Spengler, 2019). *Malus domestica*, the  
147 standard cultivated apple, is also currently grown in various regions of the Caucasus (Forsline et  
148 al., 2003; Gharghani et al., 2010; Gharghani et al., 2009; Langenfeld, 1991; Schmitt, 2007). So  
149 far, the relationships between *M. orientalis*, the local Caucasian cultivars, *M. domestica* and its  
150 Central Asian progenitor, *Malus sieversii*, are still unknown. This raises the following questions:  
151 i) Are cultivated apples in the Caucasus derived from the same domestication event as *M.*  
152 *domestica*? ii) If not, has *M. orientalis* contributed to the local cultivated Caucasian apple

153 germplasm through wild-to-crop introgression, in the same way that *M. sylvestris*, the European  
154 crab apple, contributed to the *M. domestica* gene pool (Cornille et al., 2012; Ali Gharghani et al.,  
155 2009)?; iii) Are wild *M. orientalis* and/or crop-wild hybrid trees cultivated in gardens and  
156 orchards in Iran? Conversely, are there feral and/or hybrid trees in the wild? The extent of crop-  
157 wild gene flow in apples in the Caucasus has just begun to be investigated. One study suggested  
158 that *M. orientalis* only made a minor contribution to Mediterranean *M. domestica* cultivars  
159 (Cornille et al., 2012), but lacked in-depth investigation. A population genetics study revealed  
160 low levels of crop-to-wild gene flow from *M. domestica* to *M. orientalis* in natural forests of  
161 Armenia, Turkey and Russia (Cornille et al., 2013a). Population genetic diversity and structure  
162 analyses of *M. orientalis* populations from the Western and South Caucasus identified three  
163 differentiated populations: one in Turkey, one in Armenia and one in Russia (Cornille et al.,  
164 2013a). On a smaller geographic scale, an east-west genetic subdivision was found across the  
165 Hyrcanian Forests in Iran, with five main populations showing admixture (Amirchakhmaghi et  
166 al., 2018). However, we still lack a comprehensive view (beyond Armenia) of the genetic  
167 diversity and structure of *M. orientalis* to understand its natural divergence history. In addition,  
168 studying local cultivars from the Caucasus will shed light on the relationships between local wild  
169 apple populations, the local cultivated apple and the standard cultivated apple *M. domestica*, as  
170 well as the extent of crop-wild gene flow in apple in this region.

171 Here, we investigate anthropogenic and natural divergence processes in apples from the  
172 Caucasus and the extent of gene flow during divergence. A total of 550 apple trees, comprising  
173 local cultivated and wild apples from the Caucasus, *M. domestica* apple cultivars and *M.*  
174 *sieversii*, were sampled and genotyped using 26 microsatellite markers. In addition, the Siberian  
175 wild apple *Malus baccata* was used as an outgroup in certain analyses. From the analysis of this  
176 comprehensive genetic dataset, combined with ecological niche modeling approaches, we  
177 addressed the following questions: 1) What is the population genetic structure among Caucasian  
178 wild and cultivated apples, *M. domestica* and *M. sieversii*, and what are their genetic  
179 relationships, levels of genetic diversity and demographic history? 2) Is there any crop-crop or  
180 crop-wild gene flow in the Caucasus? Are there feral or crop-wild hybrid trees in the wild or,  
181 conversely, do humans cultivate wild or hybrid trees? 3) Did *M. orientalis* experience past range  
182 contraction and expansion associated with the last glacial maximum?

183

## 184 **Materials and methods**

### 185 **Sampling, DNA extraction and microsatellite genotyping**

186 Microsatellite genotyping data for *M. orientalis* (Cornille et al., 2013a, 2012), *M. sieversii* from  
187 Kazakhstan (Cornille et al., 2013a), *M. domestica* (Cornille et al., 2013a) and *M. baccata*  
188 (Cornille et al., 2012) were from previously published studies; we had previously available data  
189 for 207 *M. orientalis* individuals from Turkey, Armenia and Russia (23 sites, Tables S1 and S2),  
190 four apple cultivars from Armenia, 40 “pure” European cultivated *M. domestica* individuals (*i.e.*,  
191 not -introgressed by *M. sylvestris*) (Tables S1 and S2), 20 *M. sieversii* individuals from  
192 Kazakhstan (Cornille et al., 2012) and 22 *M. baccata* individuals from Russia (Cornille et al.,  
193 2012). We collected new samples in 2017 in Iran and in 2018 in Kyrgyzstan (*M. sieversii*). A  
194 total of 257 samples were collected for this study: 167 *M. orientalis* individuals from the  
195 Hyrcanian Forests and the Zagros region in Iran (Table S1), 48 local Iranian apple cultivars from  
196 the *Seed and Plant Improvement Institute* (Karaj, Iran) (Table S1) and 42 *M. sieversii* individuals  
197 from Kyrgyzstan. Note that for 18 of the 48 local Iranian samples, we measured fruit size (Table  
198 S1). Collections meet the requirements of the recently enacted Nagoya protocol on access to  
199 genetic resources and the fair and equitable sharing of benefits. Thus, a total of 550 individuals  
200 were analyzed, comprising 374 wild *M. orientalis*, 48 Iranian and four Armenian apple cultivars,  
201 40 European apple cultivars belonging to *M. domestica*, 62 *M. sieversii* (from Kyrgyzstan and  
202 Kazakhstan) and 22 *M. baccata* individuals (details are provided in Table S1).

203 DNA from the new samples ( $N = 257$ ) was extracted from dried leaves with the  
204 NucleoSpin plant II DNA extraction kit (Macherey & Nagel, Düren, Germany®) following the  
205 manufacturer’s instructions. Multiplex microsatellite PCR amplifications were performed with a  
206 multiplex PCR kit (Qiagen Inc.®) for 26 microsatellite markers as previously described (Cornille  
207 et al., 2012; Patocchi, Frei, Frey, & Kellerhals, 2009). Note that on each DNA plate, we included  
208 three controls, *i.e.*, one sample of *M. orientalis*, one of *M. sieversii* and one of *M. domestica* for  
209 which data were already available (Cornille et al., 2013a). Genotypes of the controls for each of  
210 the 26 microsatellite markers were compared with the 2013 dataset. We retained only multilocus  
211 genotypes for which < 20 % of the data was missing. The suitability of these markers for  
212 population genetics analyses has been demonstrated in previous studies (Cornille et al., 2013a;  
213 Cornille, Gladieux, & Giraud, 2013b; Cornille et al., 2012).

214

215 **Bayesian inferences of population structure and genetic differentiation among wild and**  
216 **cultivated apples**

217 We investigated the population structure of wild and cultivated apples with the individual-based  
218 Bayesian clustering methods implemented in STRUCTURE 2.3.3 (Pritchard, Stephens, &  
219 Donnelly, 2000). STRUCTURE uses Markov chain Monte Carlo (MCMC) simulations to infer  
220 the proportion of ancestry of genotypes from  $K$  distinct clusters. The underlying algorithms  
221 attempt to minimize deviations from Hardy–Weinberg within clusters and linkage disequilibrium  
222 among loci. We ran STRUCTURE from  $K = 1$  to  $K = 15$ . Based on 10 repeated runs of MCMC  
223 sampling from 500,000 iterations after a burn-in of 50,000 steps, we determined the amount of  
224 additional information explained by increasing  $K$  using the  $\Delta K$  statistic (Evanno, Regnaut, &  
225 Goudet, 2005) as implemented in the online post-processing software Structure Harvester (Earl,  
226 2012). However, the  $K$  value identified with the  $\Delta K$  statistic often does not correspond to the  
227 most biologically relevant number of clusters, as it only corresponds to the strongest population  
228 subdivision level and not the finest subdivision level (Puechmaille, 2016); we therefore visually  
229 checked the bar plots and chose the  $K$  value for which all clusters had well-assigned individuals  
230 (indicating the existence of a genuine population subdivision), while no further well-delimited  
231 and biogeographically relevant clusters could be identified for higher  $K$  values (indicating we  
232 reached the highest  $K$  value for which new genuine clusters could be delimited).

233 We ran STRUCTURE for the whole dataset ( $N = 550$ ) to investigate the population  
234 genetic structure among the Caucasian wild apple *M. orientalis*, the Caucasian cultivated apples,  
235 *M. sieversii*, *M. domestica* and *M. baccata*. We further explored the genetic variation and  
236 differentiation among the genetic groups detected with STRUCTURE using three different  
237 methods. First, we ran a principal component analysis (PCA) for all individuals with the *dudi.pca*  
238 function from the *adegenet* R package (Jombart & Ahmed, 2011). For the PCA, individuals that  
239 were assigned to a given cluster with a membership coefficient  $\geq 0.85$  were colored according to  
240 the respective color of each cluster, and admixed individuals (*i.e.*, individuals with a membership  
241 coefficient to any given cluster  $< 0.85$ ) were colored in gray. We chose this threshold based on  
242 the distribution of the maximum membership coefficients inferred with STRUCTURE (see  
243 results). The angle used to draw the PCA was 380 degrees for a better visualization of the data.  
244 Second, we generated a neighbor-net tree with Splitstree v4 (Huson, 1998; Huson &  
245 Scornavacca, 2012), using the PCA color code. Third, we explored the relationships among

246 populations identified with STRUCTURE (*i.e.*, clusters of individuals with a membership  
247 coefficient  $\geq 0.85$  to a given cluster) with a neighbor joining (NJ) tree (Huson, 1998; Huson &  
248 Scornavacca, 2012). The NJ tree and the neighbor-net tree were built using Nei's standard  
249 genetic distance (Nei, 1987) computed among individuals or populations with the Populations  
250 software v1.2.31 (<https://bioinformatics.org/populations/>).

251  
252 **Genetic diversity estimates and test for the occurrence of a bottleneck in wild and cultivated**  
253 **apples**

254 We computed descriptive population genetic estimates for each population (*i.e.*, each cluster  
255 inferred with STRUCTURE, excluding admixed individuals with a membership coefficient  $<$   
256 0.85). We calculated allelic richness ( $A_R$ ) and private allelic richness ( $A_P$ ) with ADZE (Szpiech,  
257 Jakobsson, & Rosenberg, 2008) using standardized sample sizes of  $N_{ADZE} = 7$  (one individual x  
258 two chromosomes), corresponding to the minimal number of observations across populations.  
259 Heterozygosity (expected and observed), Weir and Cockerham  $F$ -statistics and deviations from  
260 Hardy–Weinberg equilibrium were calculated with Genepop v4.2 (Raymond & Rousset, 1995;  
261 Rousset, 2008).

262  
263 **Approximate Bayesian computation to reconstruct the domestication history of the Iranian**  
264 **cultivated apple**

265 We used approximate Bayesian computation to test whether cultivated apples in the Caucasus  
266 were derived from the same domestication event as *M. domestica*. We used the newly developed  
267 ABC method based on a machine learning tool named “random forest” (ABC-RF) to perform  
268 model selection and parameter estimates (Estoup et al., 2018; Pudlo et al., 2016; Raynal et al.,  
269 2019). In brief, this method creates a “forest” of bootstrapped decision trees that ranks scenarios  
270 based on the summary statistics of the datasets. Some simulations are not used to build the trees  
271 and can thus be used to cross-validate the analysis by computing a “prior error rate”. This  
272 approach allows the comparison of complex demographic models (Pudlo et al., 2016) by  
273 comparing groups of scenarios with a specific type of evolutionary event with other groups with  
274 different types of evolutionary events instead of considering all scenarios separately (Estoup et  
275 al., 2018).

276 Using the ABC-RF framework, we compared different scenarios of domestication of  
277 Iranian cultivars, *i.e.*, with an origin from i) *M. domestica*, ii) *M. sieversii* from Kazakhstan, iii)  
278 another, unknown ancestor. Populations were defined as the clusters detected with  
279 STRUCTURE, removing putative hybrid individuals (*i.e.*, individuals with a membership  
280 coefficient  $< 0.85$  to any given cluster). We removed putative hybrids in order to retrace the  
281 divergence history and historical gene flow among populations; more recent admixture events  
282 being detectable directly from the STRUCTURE bar plots. We assumed bidirectional gene flow  
283 among wild and cultivated apple populations. The model parameters used were: the divergence  
284 time between  $X$  and  $Y$  populations ( $T_{X-Y}$ ), the effective population size of population  $X$  ( $N_{E-X}$ ) and  
285 the migration rate per generation between  $X$  and  $Y$  populations ( $m_{X-Y}$ ). Prior values for divergence  
286 time were drawn from the log-uniform distribution bounded between the distributions used in the  
287 approximate Bayesian computations and are given in Table S3.

288 For all models, microsatellite datasets were simulated for 14 out of the 26 markers that  
289 had perfect repeats (Ch01h01, Ch01h10, Ch02c06, Ch02d08, Ch05f06, Ch01f02, Hi02c07,  
290 Ch02c09, Ch03d07, Ch04c07, Ch02b03b, MS06g03, Ch04e03, Ch02g01, (Cornille et al., 2013;  
291 Cornille et al., 2012; Patocchi, Fernández-Fernández, et al., 2009). We checked that the  
292 population structure inferred with 14 microsatellite markers did not differ significantly from the  
293 inferences obtained with 26 SSR markers (data not shown). We assumed a generalized stepwise  
294 model of microsatellite evolution. Mutation rates were allowed to vary across loci, with locus-  
295 specific mutation rates drawn from a gamma distribution ( $\alpha, \alpha/\mu$ ) where  $\mu$  is the mutation rate per  
296 generation and  $\alpha$  is a shape parameter. We assumed a log-uniform prior distribution for  $\mu$  (1e-5,  
297 1e-3) and a uniform distribution for  $\alpha$  (1.30) (Table S3).

298 We used ABCtoolbox (Wegmann, Leuenberger, Neuenschwander, & Excoffier, 2010)  
299 with fastsimcoal 2.5 (Excoffier & Foll, 2011) to simulate datasets, using model parameters drawn  
300 from prior distributions (Table S3). We performed 7,500 simulations per scenario. For each  
301 simulation, we calculated three summary statistics per population with arlsumstats v 3.5  
302 (Excoffier and Lischer 2010):  $H$ , the mean heterozygosity across loci,  $sd(GW)$ , the standard  
303 deviation of the mean Garza-Williamson statistic over populations (Garza and Williamson, 2001)  
304 and the pairwise  $F_{ST}$  between populations (Weir and Cockerham, 1984).

305 We used the abcrf v.1.7.0 R statistical package (Pudlo et al., 2016) to carry out the  
306 ABC-RF analysis. This analysis provides a classification vote that represents the number of times

307 a scenario is selected as the best one among  $n$  trees in the constructed random forest. For each  
308 ABC step, we selected the scenario, or the group of scenarios, with the highest number of  
309 classification votes as the best scenario, or best group of scenarios, among a total of 500  
310 classification trees (Breiman, 2001). We computed the posterior probabilities and prior error rates  
311 (*i.e.*, the probability of choosing a wrong group of scenarios when drawing model index and  
312 parameter values from the priors of the best scenario) over 10 replicate analyses (Estoup et al.,  
313 2018) for each ABC step. We also checked visually that the simulated models were compatible  
314 with the observed dataset by projecting the simulated and the observed datasets onto the two first  
315 linear discriminant analysis (LDA) axes (Pudlo et al., 2016), and by checking that the observed  
316 dataset fell within the clouds of simulated datasets. We then calculated parameter inferences  
317 using the final selected model. Note that the ABC-RF approach includes the model checking step  
318 that was performed *a posteriori* in previous ABC methods.

319  
320 **Identification of crop-wild hybrids and historical gene flow in the wild apple *M. orientalis* in**  
321 **the Caucasus**

322 To assess the extent of crop-wild gene flow in the Caucasus, we removed *M. sieversii* and *M.*  
323 *baccata* from the dataset (resulting in a dataset with  $N = 466$ , Table S2) and ran STRUCTURE  
324 with the same parameters as above. We defined hybrids resulting from crop-to-wild introgression  
325 as *M. orientalis* trees assigned to the *M. domestica* or the Iranian or Armenian cultivated gene  
326 pools with a membership coefficient  $> 0.10$ . We defined hybrids resulting from wild-to-crop  
327 introgression as cultivars assigned to any of the wild gene pools with a membership coefficient  $>$   
328  $0.10$ . We chose this threshold based on the distribution of the maximum membership coefficients  
329 inferred with STRUCTURE (see results).

330 After removing crop-wild hybrids, we estimated the extent of historical gene flow in *M.*  
331 *orientalis* in the Caucasus using two methods. First, we tested whether there was a significant  
332 isolation-by-distance (IBD) pattern. We computed the correlation between  $F_{ST}/(1-F_{ST})$  and the  
333 natural algorithm of geographic distance with SPAGeDI 1.5 (Hardy & Vekemans, 2002). Second,  
334 for each population, we computed the Nason's kinship coefficient  $F_{ij}$  between pairs of individuals  
335  $i$  and  $j$  (Loiselle, Sork, Nason, & Graham, 1995)) with SPAGeDI 1.5 (Hardy & Vekemans, 2002),  
336 and regressed  $F_{ij}$  against the natural logarithm of geographic distance,  $\ln(d_{ij})$ , to obtain the  
337 regression slope  $b$ . We permuted the spatial position of individuals 9,999 times to test whether

338 there was a significant spatial genetic structure between sites. We then calculated the  $Sp$  statistic,  
339 defined as  $Sp = -bLd/(1-F_N)$ , where  $F_N$  is the mean  $F_{ij}$  between neighboring individuals  
340 (Vekemans & Hardy, 2004a), and  $-bLd$  is the regression slope of  $F_{ij}$  against  $\ln(d_{ij})$ . A low  $Sp$   
341 implies low spatial population structure, which suggests high historical gene flow and/or high  
342 effective population size.

343

### 344 **Spatial pattern of genetic diversity in the Caucasian crab apple**

345 We investigated spatial patterns of diversity in “pure” *M. orientalis*. To this aim, we excluded the  
346 crop-to-wild hybrids detected in the second STRUCTURE analysis (*i.e.*, excluding *M. baccata*  
347 and *M. sieversii*), as well as *M. domestica* and the Iranian and Armenian cultivars. Spatial  
348 patterns of genetic diversity in the “pure” *M. orientalis* were visualized by mapping the variation  
349 across space ( $A_R$ ) at 36 sites (*i.e.*, geographic locations for which at least five individuals were  
350 successfully genotyped for each marker, Table S2) with the geometry-based inverse distance  
351 weighted interpolation in QGIS (Quantum GIS, GRASS, SAGA GIS). We calculated allelic  
352 richness ( $A_R$ ) and private allelic richness ( $A_P$ ) per site with ADZE (Szpiech et al., 2008) using  
353 standardized sample sizes of  $N_{ADZE} = 6$  (one individual x two chromosomes), corresponding to  
354 the minimal number of observations across sites.

355

### 356 **Species distribution modeling**

357 The BIOMOD2 R package (Thuiller, Georges, Engler & Breiner, 2016) was used to project past  
358 and present distributions of *M. orientalis* following the species distribution modeling methods of  
359 Leroy *et al.* (2014). A set of 19 bioclimatic variables from WorldClim.org was used in addition to  
360 monthly temperature and precipitation values. Climate data were obtained for past conditions  
361 from the last glacial maximum and for the current period between 1960 and 1990. The climate  
362 projection at the 2.5-minute spatial resolution from the CCSM4 global climate model was used  
363 (<https://www.worldclim.org/data/worldclim21.html#>), as we previously showed that it was the  
364 most accurate for apple trees (Cornille et al., 2013). Past and present distributions were projected  
365 using three modeling algorithms: a generalized linear model (GLM), a generalized additive  
366 model (GAM) and artificial neural networks (ANN).

367 The location of 339 “pure” *M. orientalis* trees (*i.e.*, individuals assigned to a wild apple  
368 gene pool with a membership coefficient  $> 0.9$ , see results from the second STRUCTURE

369 analysis) provided the longitude and latitude coordinates. Duplicate data points were removed,  
370 resulting in 57 presence points for *M. orientalis* (Table S4). We did not have absence data so we  
371 randomly selected pseudo-absences to serve as “absence” points for the model, and weighted  
372 presence and absence points equally as per Barbet-Massin *et al.* (2012). Models were calibrated  
373 using the set of bioclimatic variables and model evaluation was calculated with Jaccard’s indices.  
374 Ensemble model forecasting was completed by pulling the average trend of the three modeling  
375 algorithms and retaining only the uncorrelated bioclimatic variables with a Pearson correlation  
376 threshold greater than 0.75 (Table S5). The model was run again using only variables with high  
377 predictive power.

378

## 379 **Results**

380

### 381 **Clear genetic structure and variation in cultivated and wild apples**

382 The  $\Delta K$  statistic indicated that the strongest level of population subdivision was at  $K = 3$  (Figure  
383 S1 a, b). However, further genetic subdivisions were observed for  $K > 3$ , with well delimited and  
384 biologically meaningful clusters. We therefore visually examined the bar plots and chose the  $K$   
385 value at which all clusters had fully assigned individuals, indicating the finest level of genetic  
386 subdivision. At  $K = 12$ , STRUCTURE identified twelve well-delimited clusters (Figures 1 a, b  
387 and S2) corresponding to species and/or geographic regions (Figure 1). We therefore considered  
388 these twelve clusters as the most relevant genetic structure.

389 Among these twelve clusters were two distinct genetic clusters of *M. sieversii*, one from  
390 Kazakhstan and one from Kyrgyzstan (in two shades of light blue, respectively, Figure 1), and a  
391 specific genetic cluster of *M. baccata* (orange red). We identified seven distinct genetic groups of  
392 *M. orientalis*: a genetic group from the Western Caucasus (Russia, Turkey and northwestern  
393 Armenia; orange), a central Armenian group (blue), a southern Armenian group (brown), and  
394 four genetic groups in Iran corresponding to two gene pools spread across the Zagros Forests  
395 (including samples from the Lorestan province in light green and from the Kurdistan province in  
396 red), and two gene pools (pink and purple) spread across the Hyrcanian Forests (Figure 1 a, b).

397 The *M. domestica* apple cultivars formed a specific genetic group (yellow) that was well  
398 separated from the wild *M. orientalis* and the Iranian and Armenian cultivars. The Iranian apple  
399 cultivars formed two gene pools: one that included only cultivars (dark green), and another

400 (purple) that included cultivated trees and wild *M. orientalis* individuals from the Hyrcanian  
401 Forests. We also detected Iranian cultivated trees that were highly admixed between the Iranian  
402 cultivated dark green cluster, the Iranian purple cluster, the *M. domestica* yellow cluster and with  
403 two other clusters (red and orange), the latter two included several wild *M. orientalis* individuals  
404 from the Zagros Forests in the Kurdistan province in Iran and the Western Caucasus, respectively  
405 (Figures 1 and S2). The four Armenian cultivated apple fell within the blue and orange clusters,  
406 which also included wild *M. orientalis* trees.

407 We assigned individuals with a membership coefficient  $> 0.85$  to a given cluster to the  
408 corresponding population (Figure S3) to assess the genetic variation among wild and cultivated  
409 apples. The PCA (Figure 1c) showed that *M. baccata* was highly differentiated from the other  
410 genetic groups (Figure 1c, upper left). The European (yellow) and the two Iranian cultivated  
411 genetic clusters (green and purple) formed well differentiated gene pools (Figure 1c, lower right).  
412 *Malus orientalis* from the Western Caucasus (orange) and Central and Southern Armenia (brown  
413 and blue) were closer to each other than to the Iranian wild apples (light green, red and pink),  
414 which clustered together. *Malus sieversii* from Kazakhstan was closer to the Armenian and  
415 Iranian wild apple than *M. sieversii* from Kyrgyzstan.

416 STRUCTURE analysis and PCA thus revealed three main aspects in the history of  
417 apples in the Caucasus. First, cultivated apples in Iran (dark green) may have resulted from a  
418 domestication event that was independent from the domestication of *M. domestica*, as their  
419 respective clusters are not closely related in the PCA. The close genetic relationships between the  
420 wild and cultivated Iranian clusters indicates that the cultivated apples in Iran could have been  
421 domesticated from the local wild apple, *M. orientalis*, although they could also be derived from  
422 *M. sieversii* or *M. domestica* with subsequent local gene flow in Iran. Second, the full  
423 membership of a substantial number of cultivated trees to genetic clusters of wild *M. orientalis*  
424 suggests that wild trees are grown in orchards for consumption without any strong domestication  
425 process and/or feral individuals occur (*e.g.*, the purple genetic cluster may represent a cultivated  
426 group that is also found in the wild as feral). In addition, the high level of admixture in several  
427 Iranian cultivated apple trees with wild *M. orientalis* gene pools indicate substantial wild-crop  
428 gene flow. Third, the spatial population structure of *M. orientalis* in the Caucasus may result  
429 from past range contraction and expansion associated with the last glacial maximum. We tested  
430 these hypotheses as described in the methods. First, we investigated the genetic diversity, genetic

431 differentiation and evolutionary history of cultivated and wild apple populations using a  
432 statistical framework for assessing the probability of different domestication scenarios. Second,  
433 we estimated the extent of crop-wild and wild-wild gene flow in apples in the Caucasus. Third,  
434 we investigated past contraction and expansion of wild apple populations in the Caucasus using  
435 both genetic diversity estimates and ecological niche modeling.

436

### 437 **Genetic diversity and differentiation among wild and cultivated apples**

438 The neighbor-net tree (Figure 2a) and the NJ tree (Figure 2b) confirmed that the apple cultivars  
439 (*M. domestica* and the purple and dark green Iranian cultivar clusters) were distinct from the wild  
440 populations (with the exception of the wild Hyrcanian purple group, see below). Note that we  
441 excluded admixed individuals (*i.e.*, individuals assigned with a membership coefficient  $< 0.85$  to  
442 a given cluster) from the NJ analysis to better assess the genetic relationships among pure  
443 cultivated and wild populations.

444 Individuals of *M. domestica* and *M. sieversii* from Kazakhstan were intermingled  
445 (Figure 2a) and the genetic clusters of these species were sister groups (Figure 2b). Neither of the  
446 two distinct Iranian cultivated gene pools (green and purple) was not sister groups with *M.*  
447 *domestica*, supporting the view that specific domestication events have occurred in Iran. The two  
448 cultivated apple populations from Iran were genetically highly differentiated (Table S6), were  
449 sister groups (Figure 2) and had lower levels of genetic diversity and fewer private alleles than *M.*  
450 *domestica* ( $P < 0.01$ , Tables 1 and S7), with the purple gene pool displaying the lowest level of  
451 genetic diversity and the least number of private alleles. The close relationships between trees  
452 sampled in the Hyrcanian Forests and cultivars from the purple gene pool (Figures 1 and 2), and  
453 the lower levels of genetic diversity in both of these populations suggest that the trees sampled in  
454 the Hyrcanian Forests assigned to the purple genetic group may be feral. Alternatively, it may be  
455 that the cultivated trees from the purple gene pool represent the first step of apple domestication  
456 in Iran, *i.e.*, wild trees cultivated by humans.

457 *Malus orientalis* and *M. sieversii* did not form a monophyletic group (Figure 2b). Wild  
458 *M. orientalis* populations from the Western Caucasus, (orange) and from central (blue) and  
459 southern (brown) Armenia grouped together, the latter two being sister groups. The *M. orientalis*  
460 population from the Lorestan province (Iran; light green) was intermingled with the *M. sieversii*  
461 population from Kyrgyzstan (cyan), (Figure 2a); when considered as separate populations (*i.e.*,

462 excluding admixed individuals Figure 2b), the two populations formed sister groups (Figure 2b).  
463 Although the wild Hyrcanian (pink and purple) populations were intermingled (with the  
464 exception of a few wild purple individuals clustering with the cultivated purple population) in the  
465 neighbor-net tree, the NJ tree indicated that the wild purple population was closer to the  
466 cultivated purple population. Some *M. sieversii* trees from Kazakhstan were intermingled with *M.*  
467 *sieversii* from Kyrgyzstan and clustered with the wild Iranian populations. *Malus sieversii* from  
468 Kazakhstan formed a distinct group, placed as a sister group to *M. domestica* in both neighbor-net  
469 and NJ trees (Figure 2). The level of allelic richness was significantly lower in the wild apple  
470 populations from the Zagros Forest (*i.e.*, Lorestan (light green) and Kurdistan (red) than in the  
471 other wild populations (Tables 1 and S7).

472  
473

#### 474 **Additional domestication events in Iran inferred with ABC-RF**

475 We defined the populations used in the ABC framework from the clusters detected with  
476 STRUCTURE at  $K=12$  for 550 wild and cultivated apple accessions, excluding admixed  
477 individuals (*i.e.*, with a membership coefficient  $< 0.85$  to any given cluster, Figure S2, as recent  
478 gene flow can easily be seen from visual inspection of the barplots). We excluded the Armenian  
479 cultivars as they were represented by only four individuals; we also excluded *M. baccata* and all  
480 wild Iranian and Armenian populations to avoid intractably complex scenarios with too many  
481 populations. We therefore included only *M. sieversii* from Kazakhstan, the cultivated (green) and  
482 wild + cultivated (purple) populations from Iran.

483 We used a two-step nested ABC-RF approach. In the first step we inferred i) the sequence  
484 of divergence of the purple wild and cultivated populations (ABC step 1, Figure 3), including  
485 scenarios assuming a sister relationship between the cultivated and wild populations, which  
486 would support that either the wild trees from the purple group are feral or that the cultivated trees  
487 from the purple group represent an early domestication step of a wild genetic cluster. In the next  
488 step, we inferred ii) the progenitor of the Iranian cultivated apple, *i.e.*, either *M. sieversii*, *M.*  
489 *domestica* or an unknown ancestral population (ABC step 2, Figure 3). To build the scenarios, we  
490 assumed that the purple Iranian cultivated population was younger than the green Iranian  
491 cultivated population, as the former population had a lower number of private alleles and lower  
492 genetic diversity (Table 1). For all scenarios, we assumed bidirectional gene flow among

493 populations. This nested ABC approach avoids comparing overly complex models with too many  
494 populations and parameters, and is more powerful than testing all scenarios individually to  
495 disentangle the main evolutionary events characterizing demography and divergence (Estoup et  
496 al., 2018).

497 For each step of the ABC-RF approach, the projection of the reference table and the  
498 observed datasets onto the two LDA axes that explained most of the variance of the summary  
499 statistics showed that the observed data fell within the distribution of the simulated summary  
500 statistics (Figure S4), forming distinct clouds for each scenario or groups of scenarios. Visual  
501 inspection of the LDA plots indicated this method had a high power to discriminate and select  
502 scenarios; results were subsequently validated by the ABC-RF inferences presented below.

503 For all ten replicates, the step 1 of the ABC-RF method supported the sister group status  
504 of the cultivated and wild purple populations, indicating that either this wild population is feral or  
505 that this cultivated group represents an early domestication step without strong genetic  
506 differentiation (scenarios sc1-after, sc2-after, sc3-after, sc4-after, average of 298 votes out of the  
507 500 RF-trees; posterior probabilities = 58%, prior error rate = 38.31%, Figure 3, Table S8). Using  
508 the group of scenarios selected in step 1 (Figure 3) as a backbone, all ten replicates of the second  
509 step of the ABC-RF analyses provided support for the domestication of the purple and the green  
510 Iranian cultivated apples from an unknown ancestral population (scenario sc1-feral, an average of  
511 308 votes out of the 500 RF-trees; posterior probabilities = 64.8%, prior error rate = 8.5 %,  
512 Figure 3, Table S9). ABC-RF inferences provided support for the independent domestication of  
513 the two cultivated Iranian populations: *i.e.*, the dark green and purple cultivated apple populations  
514 diverged independently from an unknown ancestral population *c.* 2,190 years ago (ya) and 2,890  
515 ya, respectively, while *M. domestica* diverged from *M. sieversii* *c.* 3,550 ya (Table S10).

516

### 517 **Substantial crop-wild, crop-crop and wild-wild gene flow in apples in the Caucasus**

518 The second STRUCTURE analysis, focusing on the Caucasus, revealed the same genetic  
519 clustering for wild apples and *M. domestica* at  $K = 9$  (Figure S5) as in the previous analysis ( $K =$   
520 12) (Figures 1 and 2). At  $K = 9$ , 150 apple genotypes could be considered hybrids (*i.e.*,  
521 individuals assigned to a gene pool with a membership coefficient  $< 0.9$ , this cut-off being  
522 chosen on the basis of the distribution of the cumulated membership coefficients for each  
523 individual at  $K = 9$ , Figure S6); these 150 hybrids represented 32% of the total dataset (Table 2).

524 The Iranian cultivars had the highest proportion of hybrids (67%), mostly admixed with the wild  
525 and cultivated gene pools from Iran, but also with the *M. domestica* gene pool. Hybrids of the  
526 wild Armenian apple were mostly an admixture of the wild Armenian gene pools (*i.e.*, Western,  
527 Central and Southern), suggesting local gene flow between crop and wild populations.

528 We removed the 150 hybrids and all apple cultivars (Tables 2 and S2) and focused on  
529 the extent of gene flow in the “pure” Caucasian wild apple *M. orientalis*. We detected a  
530 significant but weak isolation by distance pattern across the Caucasus ( $P < 0.001$ ,  $R\text{-squared} =$   
531  $0.07$ , Figure S7), suggesting a high level of gene flow among the sampled geographic sites. We  
532 estimated  $Sp$  values for populations with at least five sampling sites and 20 individuals, *i.e.*, the  
533 Hyrcanian (pink) and the Central Armenian (blue) wild apple populations.  $Sp$  values were low  
534 but significant ( $Sp_{\text{Hyrcanian\_pink}} = 0.0076$ ,  $Sp_{\text{Central\_blue}} = 0.0027$ ,  $P < 0.001$ ) suggesting a high  
535 level of historical gene flow within populations. However, the  $Sp$  value was higher for the Iranian  
536 population than for the Armenian population suggesting a lower level of historical gene flow  
537 within the Hyrcanian (pink) population than the Central Armenian (blue) population. Our results  
538 therefore suggest substantial crop-crop, crop-wild and wild-wild gene flow in apples in Iran and  
539 the Caucasus.

540  
541 **Range expansion and contraction of the wild apple *M. orientalis* in the Caucasus associated**  
542 **with the last glacial maximum**

543 We investigated the spatial variation of genetic diversity and used ecological niche modeling to  
544 test the existence of past range contraction and expansion for the wild apple in the Caucasus.  
545 After removing the 150 crop-wild hybrids identified from the second STRUCTURE analyses, we  
546 found a significant positive correlation between longitude and allelic richness (Figure S8, average  
547 adjusted  $R\text{-squared} = 0.66$ ,  $P < 0.0001$ ) and a significant negative correlation between latitude  
548 and allelic richness (Figure S8, average adjusted  $R^2 = -0.43$ ,  $P < 0.001$ ). We also found that the  
549 western (orange) population had the highest level of allelic richness (Tables 1 and S7 and Figure  
550 4). The western Caucasus may therefore have been a glacial refugium in the past. In addition to  
551 high levels of genetic diversity in the west, across northeastern Turkey and the Lesser Caucasus  
552 mountains in Armenia, we observed local hotspots of genetic diversity in the Hyrcanian Forests  
553 and the High Caucasus mountains (Figure 4) suggesting that these mountainous regions may have  
554 been potential glacial refugia.

555 Ecological niche modeling further indicated past contraction and expansion of the *M.*  
556 *orientalis* range. Model performance as assessed with AUC and TSS was high (Table S11),  
557 indicating that the ANN, GLM and GAM algorithms fitted the data well (Allouche, Tsoar, &  
558 Kadmon, 2006; Fieldings & Bell, 1997; Monserud & Leemans, 1992). The following six  
559 bioclimatic variables were found to have high predictive power: mean diurnal range temperature  
560 (bio2), temperature seasonality (bio4), minimum temperature of the wettest quarter (bio8),  
561 minimum temperature of the driest quarter (bio9), annual precipitation (bio12) and precipitation  
562 of the coldest quarter (bio19). These bioclimatic variables were used to calibrate the models to  
563 predict the past and present distribution of *M. orientalis*. The MIROC model (Figure 4) predicted  
564 that the areas suitable for *M. orientalis* during the LGM contracted to the western Lesser  
565 Caucasus and northeastern Turkey along the Black Sea and into the Colchis region, and also in  
566 the eastern part of the Hyrcanian Forests, near Azerbaijan, in agreement with the genetic data  
567 (Figure 4). The climatic model therefore suggested that populations of the Caucasian wild apple  
568 *M. orientalis* may have been maintained in at least two glacial refugia.

569

## 570 **Discussion**

571 Our study provides insights into the natural and anthropogenic divergence history of apples in a  
572 hotspot of crop diversity, the Caucasus. First, we identified two distinct cultivated gene pools in  
573 Iran that were well differentiated from the standard *M. domestica* apple cultivars and were not  
574 derived from *M. sieversii* or *M. domestica*. Our results thus suggest that Iran is an additional  
575 center of apple domestication. Second, we showed that the evolution of the domesticated apple  
576 involved an additional wild species: *M. orientalis*. Indeed, cultivated apple from the Caucasus  
577 belonged to the Caucasian *M. orientalis* gene pool, suggesting that local farmers use the  
578 Caucasian crabapple for cultivation. Furthermore, *M. orientalis* has contributed to the Caucasian  
579 cultivated apple germplasm through wild-to-crop introgression; a similar process has been  
580 previously described in apples in Europe (Cornille et al., 2014, 2012). Reciprocally, we detected  
581 crop-to-wild gene flow in the Caucasus, as it has been reported in Europe (Cornille et al., 2015).  
582 Third, « pure » *M. orientalis* in this region showed a clear spatial genetic structure with at least  
583 seven populations spread across the Caucasus. The combination of niche modeling and  
584 population genetics approaches suggested that these populations resulted from range contraction  
585 and expansion associated with the last glaciation. Thus, this study revealed the existence of an

586 additional center of apple domestication, which seems to have followed processes that are  
587 strikingly similar to those observed in Europe, *i.e.*, substantial wild-to-crop and crop-crop gene  
588 flow. Several origins of domestication with substantial hybridization between domestic and wild  
589 forms have also been described in other fruit trees (Groppi, Liu, Cornille, Decroocq, & Decroocq,  
590 2021; Liu et al., 2019; Wu et al., 2018).

591  
592 **An additional center of apple domestication in Iran, with two specific cultivated gene pools**  
593 **that originated independently**

594 The occurrence of two specific cultivated populations in Iran, which are genetically differentiated  
595 from the cultivated apple *M. domestica* and are not derived from *M. sieversii* or *M. domestica*,  
596 suggests that Iran is an additional center of apple domestication. Domesticated populations are  
597 expected to be nested within their source population because they recently diverged from a subset  
598 of individuals within the source population (Matsuoka et al., 2002); however, the green Iranian  
599 cultivated population was not nested within any wild population (by contrast, *M. domestica* that  
600 was nested within *M. sieversii*) suggesting that, despite our considerable sampling effort, we have  
601 so far been unable to identify the wild population that is most closely related to this cultivated  
602 (green) population. The purple Iranian cultivated population was nested within the wild purple  
603 population, but the status of this wild purple population (either feral or wild trees that are  
604 cultivated) remains unclear as we lack phenotypic data (see below). However, the monophyly of  
605 the two Iranian cultivated groups (green and purple) suggests that they diverged from the same  
606 wild population, perhaps corresponding to two successive domestication steps, or represent  
607 independent domestication events from the same progenitor. We tested these hypotheses and  
608 inferred more precisely the Iranian cultivated apple domestication history using coalescent-based  
609 methods combined with approximate Bayesian computation. We confirmed that the two Iranian  
610 cultivated populations did not diverge from *M. sieversii* or *M. domestica*, but independently from  
611 the same ancestral, unidentified population. Thus, despite the spread of the cultivated apple *M.*  
612 *domestica* along the Silk Trade Routes that crossed Iran and the South Caucasus to reach Turkey  
613 (Canepa, 2010; Spengler, 2019), specific domestication events in this region led to local  
614 cultivated apple gene pools.

615 The occurrence of independent domestication events in many crop species is a source of  
616 ongoing debate (Besnard et al., 2018; Choi et al., 2017; Gros-Balthazard & Flowers, 2021). In

617 apricot and pear, there is evidence of independent domestication events in Europe and Asia  
618 (Groppi et al., 2021; Liu et al., 2019; Wu et al., 2018). Although we could not identify the source  
619 population of the Iranian cultivated apple populations, our demographic inferences provide strong  
620 support for domestication from an ancestral gene pool other than *M. sieversii* from Kazakhstan.  
621 Distinct genetic ancestries may not reflect independent *de novo* domestication, but may instead  
622 represent a single domestication event with multiple origins (Choi et al., 2017; Gros-Balthazard  
623 & Flowers, 2021). We cannot ascertain that there were independent domestication events as we  
624 could not identify the source population. However, our data shows that the cultivated apple had  
625 multiple origins and was derived from distinct ancestral gene pools, irrespective of whether the  
626 ancestral populations were independently domesticated. Studies of the regions under selection  
627 during domestication in the Iranian and European cultivated apple genomes will likely provide  
628 insights into whether multiple *de novo* domestication events occurred. Independent selection  
629 regimes in each of the cultivated genetic groups would be a hallmark of multiple domestications.

630  
631 **The genetic relationships between the two wild contributors and the status of the wild**  
632 **Hyrceanian purple population are still unclear**

633 The relationship between *M. sieversii* and *M. orientalis* is still unclear. We found that *M. sieversii*  
634 from Kazakhstan was nested within the *M. domestica* gene pool, while *M. sieversii* from  
635 Kyrgyzstan was closer to *M. orientalis* from the Zagros and Hyrcanian regions. *Malus orientalis*  
636 thus seems to be polyphyletic and intermingled with *M. sieversii*. Deciphering the relationship  
637 between *M. sieversii* and *M. orientalis*, and even the species status of *M. orientalis*, is not only a  
638 taxonomic exercise but is needed to better understand apple domestication. This question needs  
639 to be resolved urgently, *M. sieversii* being endangered across its distribution (Omasheva et al.,  
640 2017; H.-X. Zhang, Li, & Li, 2018), as confirmed here by the lower level of genetic diversity of  
641 the *M. sieversii* population in Kyrgyzstan. Likewise, the status of the wild purple population in  
642 the Hyrcanian Forests is still unclear. Individual trees are isolated in mountainous areas, but  
643 found close to grafted fruit trees on *Craetagus*, although they are not cultivated (personal  
644 observation. H. Yousefzadeh). Like domestication, feralization can be seen as a process that is  
645 accompanied by admixture and introgression, and can be accompanied by a range of genetic,  
646 phenotypic and demographic changes (Mabry, Rowan, Pires, & Decker, 2021). The purple wild  
647 population had a lower level of genetic diversity than the other wild Iranian population, which

648 may suggest that this population has recently escaped from cultivation. Feral populations have  
649 also been found in other fruit trees including olive (Besnard et al., 2018), almond (Balaguer-  
650 Romano et al., 2021) and apricot (Robert N. Spengler, Chang, & Tourtellotte, 2013). However,  
651 the purple population found in the Hyrcanian Forests could also be the result of a first  
652 domestication step, as wild apples are widely used for cultivation in Iran (personal  
653 communication H. Yousefzadeh). Additional phenotyping of cultivated and wild Iranian  
654 populations, and possibly historical records, are now required to better understand whether those  
655 trees represent an ongoing domestication event or form a feral population.

656

### 657 ***Malus orientalis* is an additional contributor to the cultivated apple gene pool**

658 It seems that local farmers in the Caucasus grow the local wild *M. orientalis* rather than *M.*  
659 *domestica*. Indeed, the four Armenian cultivars shared their gene pools with the Western (orange)  
660 and Central (blue) Caucasian wild apple populations, and Iranian cultivars were highly admixed  
661 and even in some cases fully assigned to wild populations (red and purple) in Iran. This is not  
662 surprising as this wild species can grow in mountainous areas, is highly resistant to pests,  
663 diseases and drought (Amirchakhmaghi et al., 2018; Büttner, 2001; Höfer et al., 2013; Volk et al.,  
664 2008) and has high-quality fruits that have several features that are intermediate between those of  
665 *M. sylvestris* and *M. sieversii* (Cornille et al., 2014). The use of the local wild apples has also  
666 been documented in Europe for specific purposes at different times in history (Tardío, Arnal, &  
667 Lázaro, 2020).

668 The Caucasian crab apple has also considerably contributed to the Caucasian apple  
669 germplasm through wild-to-crop introgression. We found evidence of substantial wild-crop and  
670 crop-crop gene flow in the Caucasus. Indeed, we found that 41.6% of Iranian cultivars were  
671 introgressed by local wild apple gene pools or were an admixture of two cultivated gene pools.  
672 This extensive wild-to-crop and crop-crop gene flow is strikingly similar to the pattern  
673 documented in apples in Europe. *Malus sylvestris* has been shown to be a significant contributor  
674 to the *M. domestica* gene pool through recurrent and recent hybridization and introgression  
675 events ever since the cultivated apple was introduced in Europe by the Greeks around 1,500 years  
676 ago (Cornille et al., 2012). Reciprocally, substantial crop-to-wild gene flow has been reported  
677 from *M. domestica* to *M. sylvestris* (Cornille et al., 2015). Similarly, we found many crop-to-wild  
678 hybrids, from *M. domestica* to *M. orientalis* in the forests of Armenia and Iran, as observed in

679 apples in Europe (Cornille et al., 2015). Extensive gene flow has been found during the  
680 domestication of other fruit trees (Arroyo-García et al., 2006; Cornille et al., 2012; Decroocq et  
681 al., 2016; Diez et al., 2015; Duan et al., 2017; Liu et al., 2019; Meyer, Duval, et al., 2012; Myles  
682 et al., 2011). The evolutionary consequences of crop-to-wild gene flow remains unclear in fruit  
683 trees (Feurtey, Cornille, Shykoff, Snirc, & Giraud, 2017a); the extent to which crop-to-wild gene  
684 flow may threaten the local Caucasian crab apple remains to be tested.

685  
686 **The natural divergence history of the Caucasian wild apple was shaped by the last**  
687 **glaciation**

688 The climatic variations since the last glacial maximum, along with the landscape features of the  
689 Caucasus, have likely shaped the population structure and diversity of the Caucasian wild apple.  
690 We identified seven populations of *M. orientalis* in the Caucasus and Iran: one highly genetically  
691 differentiated population in the Western Caucasus (Turkey, Russia and northwestern Armenia),  
692 two in Armenia (a southern and a Central population) and four in Iran, including two in the  
693 Zagros Forest (one in the Kurdistan province and one in the Lorestan province) and two in the  
694 Hyrcanian Forests bordering the southern Caspian Sea. These wild apple populations likely arose  
695 from isolation in several refugia during the last glacial maximum. This hypothesis is supported by  
696 the observation of a large hotspot of genetic diversity located in Western Caucasus, and several  
697 local hotspots of genetic diversity in Armenia and the Hyrcanian Forests (Zazanashvili et al.,  
698 2020). Ecological niche modeling further supported the existence of strong contractions in the  
699 range of *M. orientalis* in the Western Caucasus bordering the Black Sea (including the Colchis  
700 region), as well as in the Lesser Caucasus and in some parts of the Hyrcanian Forests. Additional  
701 samples from the Western Caucasus are required to confirm this hypothesis. These glacial refugia  
702 have been described in relation to other species (Parvizi et al., 2019). Indeed, two refugia are  
703 recognized in the Caucasus (Tarkhnishvili *et al.* 2012; Yousefzadeh *et al.* 2012; Bina *et al.* 2016;  
704 Aradhya *et al.* 2017): a major forest refugium between the western Lesser Caucasus and  
705 northeastern Turkey (including the Colchis region in the catchment basin of the Black Sea) and  
706 the Hyrcanian refugium at the southern edge of the Caucasus. Further sampling of *M. orientalis*  
707 in the far Western and Eastern Caucasus and genotyping with the same microsatellite markers is  
708 needed to uncover the role of these two refugia for *M. orientalis*.

709 We also found that the natural divergence history of the Caucasian wild apple involved  
710 gene flow across the Caucasus. The weak but significant isolation-by-distance pattern further  
711 supported the existence of substantial gene flow among wild apple populations in the Caucasus.  
712 Widespread gene flow during divergence associated with the last glacial maximum has been  
713 documented for another wild apple relative *M. sylvestris* (Cornille et al., 2013). Calculation of the  
714 *Sp* parameter within the largest populations revealed high levels of historical gene flow within  
715 populations. *Sp* can also be used to compare the dispersal capacities of *M. orientalis* with that of  
716 other plants (Cornille et al., 2013; Cornille et al., 2013a; Vekemans & Hardy, 2004b). The  
717 Caucasian wild apple showed dispersal capacities that were similar to previous estimates in other  
718 wild apple species and lower than that of wind-dispersed trees. Wild apples can thus spread over  
719 kilometers (Cornille et al., 2015; Feurtey, Cornille, Shykoff, Snirc, & Giraud, 2017). The spatial  
720 population structure was somewhat stronger in Iran than in Armenia suggesting lower levels of  
721 gene flow in the Hyrcanian population. In addition to having a stronger genetic structure, the  
722 Iranian populations had lower genetic diversity than the Armenian populations, especially the  
723 Zagros and Kurdistan populations. In Iran, traditional animal husbandry is a widespread practice  
724 (Soofi et al., 2018). Such intensive farming environments may lead to forest fragmentation and  
725 may impact wild apple populations, which form low density populations. The future of Iranian  
726 wild apple populations, especially in the south where genetic diversity is low, will depend on our  
727 ability to protect them through sustainable conservation programs.

728

## 729 **Conclusion**

730 We identified Iran as a key center in the evolution and domestication of apple, and *M. orientalis*  
731 as an additional contributor to the evolutionary history of cultivated apple. We also provided  
732 insights into the processes underlying the natural divergence of this emblematic wild species and  
733 identified several populations that could be the target of conservation programs. However, *M.*  
734 *orientalis* in the Caucasian ecoregion is highly diverse and further investigations and additional  
735 sampling are necessary, as well as a better assessment of its species status and genetic  
736 relationship with *M. sieversii*. Indeed, a better understanding of the properties of functional  
737 genetic diversity and the ecological relationship of wild apples in their ecosystem is needed for  
738 developing and implementing effective conservation genetic strategies in this region (Teixeira &  
739 Huber, 2021). Our study revealed the role of gene flow and human practices in natural and

740 anthropogenic divergence processes of an emblematic fruit tree in the Caucasus. Our results are  
741 consistent with those reported for other woody perennials, including apricots (Groppi et al., 2021;  
742 Liu et al., 2019), olive (Besnard et al., 2018; Diez et al., 2015), pears (Volk & Cornille, 2019; Wu  
743 et al., 2018), or date palms (Flowers et al., 2019). This study also supports the view that  
744 domestication of fruit trees was likely a geographically diffuse and protracted process, involving  
745 multiple, geographically disparate origins of domestication (Groppi et al., 2021; Wu et al., 2018).  
746

#### 747 **Acknowledgements**

748 We thank the Franco-Iranian Campus France program « Gundhishapur » 2016-2018, the Institut  
749 Diversité Écologie et Évolution du Vivant (IDEEV) and ATIP-Avenir for funding. We thank  
750 Bolotbek Tagaev (Sustainable Livelihoods Coordinator of FFI-Kyrgyzstan) for sampling and  
751 prospection, Fauna & Flora International and more specifically the Global Trees Campaign  
752 (GTC) Program. We also thank Adrien Falce, Olivier Langella and Benoit Johannet for help and  
753 support on the INRAE-Génétique Quantitative et Evolution- Le Moulon lab cluster and the  
754 genotyping platform GENTYANE INRA UMR 1095. We thank the INRAE MIGALE  
755 bioinformatics platform (<http://migale.jouy.inra.fr>) for providing help and support, in particular  
756 Véronique Martin, Eric Montaubon and Valentin Loux. We also thanks Céline Bellard for her  
757 advices for ecological niche modeling analyses.

#### 758 **Data Availability**

759 SSR data are available on the DRYAD repository XXXX.

#### 760 **Author Contributions**

761 AC, HY conceived and designed the experiments; AC, HY obtained funding; HB, HY, SF, HBa,  
762 IG, AN, AC, JS, DG, AK sampled the material; AV, CR, AR, MF performed the molecular work;  
763 AC, HB analyzed the data; AC, HB, HY: wrote the original draft and preparation of the figures;  
764 AC, HB, HY, TG, XC, IG, AN and all co-authors: gave critical inputs in final draft and revisions.  
765

766 Figures and Tables  
767



768  
769 **Figure 1. Population genetic structure and differentiation in cultivated and wild apples from the Caucasus, *Malus domestica*,**  
770 ***Malus sieversii* and *Malus baccata* based on 26 microsatellite markers.** a. Spatial population genetic structure inferred with  
771 STRUCTURE at  $K = 12$  ( $N = 550$ ); the map represents membership proportions averaged over each geographic site for the Caucasian  
772 wild apple *M. orientalis* ( $N = 374$ , 43 sites across Turkey, Russia, Armenia and Iran). In the bottom right corner, the mean membership  
773 proportions for the apple cultivars from Armenia ( $N = 4$ ), Iran ( $N = 48$ ) and Europe (*M. domestica*,  $N = 40$ ). The size of the pie charts  
774 is proportional to the number of samples per site. b. STRUCTURE bar plot ( $N = 550$ ) at  $K = 12$  showing 12 distinct genetic clusters.  
775 Each vertical line represents an individual. Colors represent the inferred ancestry from  $K$  ancestral genetic clusters. Sites are grouped  
776 by country for the wild apple samples (i.e., Turkey, Russia, Armenia, Iran) and *M. sieversii* (i.e., Kazakhstan and Kyrgyzstan), apple  
777 cultivars are grouped according to their origin: Armenia ( $N = 4$ ), Iran ( $N = 48$ ) and *M. domestica* ( $N = 40$ ). Countries (Kazakhstan,

778 Kyrgyzstan, Armenia) and/or main regions in the Caucasus (the Western Caucasus, *i.e.*, Turkey and Russia, Zagros and Hyrcanian  
779 Forests, Central and Southern Armenia) are shown on the map. Reference samples from previously published studies of each species  
780 are: *M. orientalis* from the Western Caucasus and Central and Southern Armenia, *M. domestica* (European cultivars), *M. sieversii* from  
781 Kazakhstan (Cornille et al., 2013a) and *M. baccata* (Cornille et al., 2012) c. Principal component analysis (PCA) of 550 individuals  
782 (upper left), and after removing the outgroup *M. baccata* (lower right,  $N = 530$ ), with the respective total variation explained by each  
783 component.



785

786 **Figure 2. Genetic differentiation among cultivated and wild apples from the Caucasus, *Malus domestica*, *Malus sieversii* and**  
 787 ***Malus baccata* based on 26 microsatellite markers. a. Neighbor-net representing the genetic relationships among wild and cultivated**  
 788 **individuals inferred with STRUCTURE at  $K = 12$ . Colors correspond to the genetic groups inferred with STRUCTURE at  $K = 12$  and**  
 789 **admixed samples are in grey. b. Neighbor-joining tree representing the distance among the twelve populations detected with**  
 790 **STRUCTURE at  $K = 12$ , excluding admixed individuals (*i.e.*, individuals with a membership coefficient  $< 0.85$  to any given cluster),**  
 791 **and rooted with *M. baccata*. Each branch is coloured according to the population inferred with STRUCTURE at  $K = 12$ , nodes with a**  
 792 **grey circle represent bootstrap values  $> 80\%$ .**

793



794

795

796

797

**Figure 3. Inference of independent domestication events of cultivated apples in Iran using random-forest approximate Bayesian computation (ABC-RF) combined with coalescent-based simulations. a.** Five scenarios testing the domestication history of Iranian cultivars (purple and green) assuming the wild Iranian purple population diverged before the cultivated purple population

798 (sc1-WP-bef, sc2-WP- bef, sc3-WP- bef, sc4-WP- bef, sc5-WP- bef). b. Four scenarios testing the domestication history of Iranian  
799 cultivars (purple and green) assuming the wild Iranian purple population diverged more recently than the cultivated purple (sc1-WP-  
800 after, sc2-WP-after, sc3-WP-after, sc4-WP-after). For a and b, scenarios assumed bidirectional gene flow between crop and wild  
801 populations. c. Most likely groups of scenarios (step 1) or scenario (step 2) of Iranian apple domestication inferred from ABC-RF  
802 analyses. The corresponding most likely scenarios, or groups of scenarios, are framed in red (dashed or solid lines for steps 1 and 2,  
803 respectively). Population names correspond to the ones detected with STRUCTURE for  $K = 12$ , excluding admixed individuals (*i.e.*,  
804 individuals with a membership coefficient  $< 0.85$  to any given cluster).  
805

806



Figure 4. Spatial diversity and past contraction and expansion of *Malus orientalis* across the Caucasus. Spatial genetic diversity

1 **(allelic richness) at 36 sites ( $N = 339$ ).** **b.** Ensemble forecasting of the three different algorithms (ANN, GLM and GAM) predicting  
2 the current (a) and last glacial maximum (LGM) (b) distribution range of suitable areas for *M. orientalis*. The probabilities of being a  
3 suitable habitat are given in the legend. **The Colchis and Hyrcanian regions are shown on the maps.**

1 **Table 1. Genetic diversity estimates for wild and cultivated apple populations detected with STRUCTURE at  $K = 12$  ( $N = 424$ ,**  
 2 *i.e.*, individuals with a membership coefficient  $< 0.85$  to any given cluster were excluded from the analysis). Note that the purple  
 3 cluster was split between cultivated and wild samples. Thus, samples were partitioned into 13 populations, including 10 wild and three  
 4 cultivated apple populations.  
 5

| Wild or cultivated | Species                 | Country of origin | Population             | $N$ | $H_O$ | $H_E$ | $F_{IS}$            | $A_R (G=7)$ | $A_P (G=7)$ |
|--------------------|-------------------------|-------------------|------------------------|-----|-------|-------|---------------------|-------------|-------------|
| wild               | <i>Malus orientalis</i> | Armenia           | Western (orange)       | 20  | 0.82  | 0.86  | <b>0.05**</b>       | 5.04±0.13   | 0.97±0.10   |
|                    |                         |                   | Central (blue)         | 109 | 0.78  | 0.79  | 0.01 <sup>NS</sup>  | 4.03±0.14   | 0.60±0.08   |
|                    |                         |                   | Southern (brown)       | 29  | 0.76  | 0.79  | 0.03 <sup>NS</sup>  | 4.38±0.17   | 0.63±0.12   |
|                    |                         | Iran              | Lorestan (light green) | 10  | 0.84  | 0.46  | <b>-0.82***</b>     | 2.03±0.12   | 0.23±0.06   |
|                    |                         |                   | Kurdestan (red)        | 12  | 0.75  | 0.71  | <b>-0.05*</b>       | 3.71±0.15   | 0.50±0.09   |
|                    |                         |                   | Hyrceanian (pink)      | 88  | 0.71  | 0.76  | <b>0.07***</b>      | 4.12±0.18   | 0.65±0.10   |
|                    |                         |                   | Hyrceanian (purple)    | 19  | 0.76  | 0.63  | <b>-0.21***</b>     | 3.24±0.13   | 0.21±0.03   |
|                    | <i>Malus sieversii</i>  | Kazakhstan        | (light blue)           | 40  | 0.74  | 0.76  | <b>0.03*</b>        | 4.15±0.16   | 0.99±0.13   |
|                    |                         | Kyrkyzstan        | (cyan)                 | 17  | 0.70  | 0.73  | <b>0.04*</b>        | 3.47±0.14   | 0.30±0.06   |
|                    | <i>Malus baccata</i>    | Russia            | (light red)            | 17  | 0.52  | 0.55  | 0.06 <sup>NS</sup>  | 3.23±0.19   | 1.08±0.14   |
| cultivated         | <i>Malus domestica</i>  | Mostly Europe     | European cultivars     | 38  | 0.78  | 0.78  | -0.00 <sup>NS</sup> | 4.27±0.09   | 0.85±0.10   |

|              |   |      |                                   |            |      |      |                  |           |           |
|--------------|---|------|-----------------------------------|------------|------|------|------------------|-----------|-----------|
|              | ? | Iran | Iranian cultivars<br>(purple)     | 18         | 0.77 | 0.61 | <b>-0.26 ***</b> | 3.08±0.13 | 0.10±0.02 |
|              |   |      | Iranian cultivars<br>(dark green) | 7          | 0.71 | 0.65 | <b>-0.08 *</b>   | 3.39±0.13 | 0.52±0.09 |
| <b>TOTAL</b> |   |      |                                   | <b>424</b> |      |      |                  |           |           |

1

2  $N$ : number of individuals assigned to a focal cluster with a membership coefficient  $> 0.85$ ;  $H_O$  and  $H_E$ : observed and expected  
3 heterozygosity;  $F_{IS}$ : inbreeding coefficient;  $A_R$ : mean allelic richness across loci, corrected by the rarefaction method, estimated for a  
4 sample size of 7;  $A_P$ : number of private alleles, corrected by the rarefaction method, estimated for a sample size of 7; \*:  $0.05 < P <$   
5  $0.01$ ; \*\*\*:  $P < 0.001$ ; NS : non-significant.

6

1 **Table 2. Distribution of hybrids (i.e., individuals with a membership coefficient < 0.90 to any given genetic cluster, as inferred**  
 2 **with STRUCTURE for  $K = 9$ ) in cultivated and wild apple in the Caucasus ( $N = 466$ , 26 microsatellite markers).** For each group  
 3 (cultivated or wild, from different regions),  $N_{tot}$  is the total number of samples in each group,  $N$  is the number of hybrids assigned to  
 4 each gene pool and % is the respective percentage over the total number of samples from each group, the mean introgression rate is the  
 5 mean membership coefficient to this gene pool. Note that some admixed trees were assigned to several gene pools with a membership  
 6 coefficient < 0.90; the total number of hybrids associated with each cluster (TOTAL) is given on the last line of the table. We also  
 7 showed the distribution of crop-crop, crop-to-wild, wild-to-crop and wild-to-wild hybrids.

8

| Genepool                               |                                   | Crop                       |                      |                                                          | Wild                              |                           |                           |                       |          |
|----------------------------------------|-----------------------------------|----------------------------|----------------------|----------------------------------------------------------|-----------------------------------|---------------------------|---------------------------|-----------------------|----------|
|                                        |                                   | Armeni<br>a<br>$N_{tot}=3$ | Iran<br>$N_{tot}=48$ | <i>M.</i><br><i>domestic</i><br><i>a</i><br>$N_{tot}=40$ | Armeni<br>a<br>$N_{tot}=19$<br>6  | Iran<br>$N_{tot}=16$<br>7 | Russi<br>a<br>$N_{tot}=5$ | Turkey<br>$N_{tot}=6$ |          |
| <i>Malus domestica</i>                 | mean introgression rate           | 0                          | <b>0.13</b>          | 0.66                                                     | 0.04                              | 0.02                      | 0                         | 0                     |          |
|                                        | N (% over the total)              | 0                          | <b>11 (23%)</b>      | 2 (5%)                                                   | 4 (2%)                            | 5 (2.9%)                  | 0                         | 0                     |          |
| Wild and cultivated Hyrcanian (purple) | mean introgression rate           | 0                          | <b>0.36</b>          | 0.33                                                     | 0                                 | <b>0.16</b>               | 0                         | 0                     |          |
|                                        | N (%)                             | 0                          | <b>18 (37.5%)</b>    | 2 (5%)                                                   | 0                                 | <b>13 (7.8%)</b>          | 0                         | 0                     |          |
| Cult. Iran (dark_green)                | mean introgression rate           | 0                          | <b>0.17</b>          | 0                                                        | 0.05                              | <b>0.06</b>               | 0                         | 0                     |          |
|                                        | N (%)                             | 0                          | <b>14 (30%)</b>      | 0                                                        | 11 (5.6%)                         | <b>8 (4.7%)</b>           | 0                         | 0                     |          |
|                                        | <b>Ncrop-crop hybrids (and %)</b> | 0                          | <b>43 (89.5%)</b>    | <b>4 (1%)</b>                                            | <b>Ncrop-to-wild hybrids (and</b> | <b>15 (7.6%)</b>          | <b>26 (18.1%)</b>         | <b>0</b>              | <b>0</b> |

|                        |                                      |                |                   |          |                                   |                   |                   |                |                |
|------------------------|--------------------------------------|----------------|-------------------|----------|-----------------------------------|-------------------|-------------------|----------------|----------------|
|                        |                                      |                | )                 |          | %)                                |                   | )                 |                |                |
| Hyrcanian (pink)       | mean introgression rate              | 0              | <b>0.05</b>       | 0        |                                   | 0                 | <b>0.41</b>       | 0              | 0              |
|                        | N (%)                                | 0              | <b>6 (12.5%)</b>  | 0        |                                   | 0                 | <b>34 (20.3%)</b> | 0              | 0              |
| Lorestan (light green) | mean introgression rate              | 0              | 0.01              | 0        |                                   | 0                 | 0.04              | 0              | 0              |
|                        | N (%)                                | 0              | 2 (4%)            | 0        |                                   | 0                 | 6 (3.6%)          | 0              | 0              |
| Wild Kurdistan (red)   | mean introgression rate              | 0              | <b>0.17</b>       | 0        |                                   | 0                 | <b>0.27</b>       | 0              | 0              |
|                        | N (%)                                | 0              | <b>12 (35%)</b>   | 0        |                                   | 0                 | <b>30 (17.9%)</b> | 0              | 0              |
| Western (orange)       | mean introgression rate              | 0.65           | 0.08              | 0        |                                   | <b>0.28</b>       | 0.02              | 0.49           | 0.84           |
|                        | N (%)                                | 1 (33%)        | 3 (6.2%)          | 0        |                                   | <b>33 (16.8%)</b> | 4 (2.3%)          | 1 (20%)        | 2 (33%)        |
| Southern (brown)       | mean introgression rate              | 0              | 0.02              | 0        |                                   | <b>0.17</b>       | 0.02              | 0.35           | 0              |
|                        | N (%)                                | 0              | 2 (4.1%)          | 0        |                                   | <b>13 (6.6%)</b>  | 2 (1.1%)          | 1 (20%)        | 0              |
| Central (blue)         | mean introgression rate              | 0.32           | 0.02              | 0        | <b>0.46</b>                       | 0.01              | 0                 | 0.11           |                |
|                        | N (%)                                | 1 (33%)        | 1 (2%)            | 0        | <b>46 (23.4%)</b>                 | 1 (0.5%)          | 0                 | 1 (16.6%)      |                |
|                        | <b>Nwild-to-crop hybrids (and %)</b> | <b>2 (66%)</b> | <b>26 (54.1%)</b> | <b>0</b> | <b>Nwild-to-wild hybrids (and</b> | <b>92 (46.9%)</b> | <b>77 (46.1%)</b> | <b>2 (40%)</b> | <b>3 (50%)</b> |

|                                        |          | )               |               | %) | )               | )               | )              |                |                  |
|----------------------------------------|----------|-----------------|---------------|----|-----------------|-----------------|----------------|----------------|------------------|
| <b>Total number of hybrids (and %)</b> | <b>1</b> | <b>32 (66%)</b> | <b>2 (5%)</b> |    | <b>58 (28%)</b> | <b>54 (32%)</b> | <b>1 (20%)</b> | <b>2 (33%)</b> | <b>150 (32%)</b> |

## 1 **References**

- 2 Allouche, O., Tsoar, A., & Kadmon, R. (2006). Assessing the accuracy of species distribution  
3 models: Prevalence, kappa and the true skill statistic (TSS). *Journal of Applied Ecology*,  
4 *43*(6), 1223–1232.
- 5 Amirchakhmaghi, N., Yousefzadeh, H., Hosseinpour, B., Espahbodi, K., Aldaghi, M., &  
6 Cornille, A. (2018). First insight into genetic diversity and population structure of the  
7 Caucasian wild apple (*Malus orientalis* Uglitzk.) in the Hyrcanian forest (Iran) and its  
8 resistance to apple scab and powdery mildew. *Genetic Resources and Crop Evolution*,  
9 *65*(4), 1255–1268. doi: 10.1007/s10722-018-0611-z
- 10 Arroyo-García, R., Ruiz-García, L., Bolling, L., Ocete, R., López, M. A., Arnold, C., ...  
11 Martínez-Zapater, J. M. (2006). Multiple origins of cultivated grapevine (*Vitis vinifera* L.  
12 ssp. *Sativa*) based on chloroplast DNA polymorphisms. *Molecular Ecology*, *15*(12),  
13 3707–3714. doi: 10.1111/j.1365-294X.2006.03049.x
- 14 Asanidze, Z., Akhalkatsi, M., Henk, A. D., Richards, C. M., & Volk, G. M. (2014a). Genetic  
15 relationships between wild progenitor pear (*Pyrus* L.) species and local cultivars native to  
16 Georgia, South Caucasus. *Flora: Morphology, Distribution, Functional Ecology of*  
17 *Plants*, *209*(9), 504–512. doi: 10.1016/j.flora.2014.06.013
- 18 Asanidze, Z., Akhalkatsi, M., Henk, A. D., Richards, C. M., & Volk, G. M. (2014b). Genetic  
19 relationships between wild progenitor pear (*Pyrus* L.) species and local cultivars native to  
20 Georgia, South Caucasus. *Flora - Morphology, Distribution, Functional Ecology of*  
21 *Plants*, *209*(9), 504–512. doi: <https://doi.org/10.1016/j.flora.2014.06.013>
- 22 Bacles, C. F. E., & Jump, A. S. (2011). Taking a tree's perspective on forest fragmentation  
23 genetics. *Trends in Plant Science*, *16*(1), 13–18. doi: 10.1016/j.tplants.2010.10.002

- 24 Bai, X. N., & Spitkovsky, A. (2010). Uncertainties of modeling gamma-ray pulsar light curves  
25 using vacuum dipole magnetic field. *Astrophysical Journal*, *715*(2), 1270–1281. doi:  
26 10.1088/0004-637X/715/2/1270
- 27 Bailey-Serres, J., Parker, J. E., Ainsworth, E. A., Oldroyd, G. E. D., & Schroeder, J. I. (2019).  
28 Genetic strategies for improving crop yields. *Nature*, *575*(7781), 109–118. doi:  
29 10.1038/s41586-019-1679-0
- 30 Balaguer-Romano, R., Barea-Marquez, A., Ocaña-Calahorro, F. J., Gomez, J. M., Schupp, E. W.,  
31 Zhang, J., & de Casas, R. R. (2021). The potential role of synzoochory in the  
32 naturalization of almond tree. *Basic and Applied Ecology*, *50*, 97–106. doi:  
33 10.1016/j.baae.2020.11.004
- 34 Barbet-Massin, M., Jiguet, F., Albert, C. H., & Thuiller, W. (2012). Selecting pseudo-absence for  
35 species distribution models: How, where and how many? *Methods in Ecology and*  
36 *Evolution*, *3*: 327–338.
- 37 Besnard, G., Terral, J. F., & Cornille, A. (2018). On the origins and domestication of the olive: A  
38 review and perspectives. *Annals of Botany*, *121*(3), 385–403. doi: 10.1093/aob/mcx145
- 39 Bina, H., Yousefzadeh, H., Ali, S. S., & Esmailpour, M. (2016). Phylogenetic relationships,  
40 molecular taxonomy, biogeography of *Betula*, with emphasis on phylogenetic position of  
41 Iranian populations. *Tree Genetics and Genomes*, *12*(5). doi: 10.1007/s11295-016-1037-4
- 42 Brandenburg, J. T., Mary-Huard, T., Rigaille, G., Hearne, S. J., Corti, H., Joets, J., ... Tenailon,  
43 M. I. (2017). Independent introductions and admixtures have contributed to adaptation of  
44 European maize and its American counterparts. *PLoS Genetics*, *13*(3), 1–30. doi:  
45 10.1371/journal.pgen.1006666
- 46 Breiman, L. (2001). Random Forests. *Machine Learning*, *45*(1), 5–32. doi:  
47 10.1023/A:1010933404324

- 48 Browicz, K. (1969). *Amygdalus*. *Flora Iranica*, 66, 166–168.
- 49 Büttner, R. (2001). *Malus*. *Hanelt P, Institute of Plant Genetics and Crop Plant Research (Eds)*  
50 *Mansfelds Encyclopedia of Agricultural and Horticultural Crops*, 471–482.
- 51 Canepa, M. (2010). Distant displays of power: Understanding Cross-Cultural Interaction Among  
52 the Elites of Rome, Sasanian Iran, and Sui-Tang China. *Ars Orientalis*, 38, 121–154.  
53 JSTOR. Retrieved from JSTOR.
- 54 Castañeda-Álvarez, N. P., Khoury, C. K., Achicanoy, H. A., Bernau, V., Dempewolf, H.,  
55 Eastwood, R. J., ... Toll, J. (2016). Global conservation priorities for crop wild relatives.  
56 *Nature Plants*, 2(4), 16022. doi: 10.1038/nplants.2016.22
- 57 Chen, J., Li, L., Milesi, P., Jansson, G., Berlin, M., Karlsson, B., ... Lascoux, M. (2019).  
58 Genomic data provide new insights on the demographic history and the extent of recent  
59 material transfers in Norway spruce. *Evolutionary Applications*, 12(8), 1539–1551. doi:  
60 10.1111/eva.12801
- 61 Choi, J. Y., Platts, A. E., Fuller, D. Q., Hsing (邢禹依), Y.-I., Wing, R. A., & Purugganan, M. D.  
62 (2017). The Rice Paradox: Multiple Origins but Single Domestication in Asian Rice.  
63 *Molecular Biology and Evolution*, 34(4), 969–979. doi: 10.1093/molbev/msx049
- 64 Cornille, A., Giraud, T., Bellard, C., Tellier, A., Le Cam, B., Smulders, M. J. M., ... Gladieux, P.  
65 (2013). Post-glacial recolonization history of the European crabapple (*Malus sylvestris*  
66 Mill.), a wild contributor to the domesticated apple. *Molecular Ecology*, 22(8), 2249–  
67 2263.
- 68 Cornille, Amandine, Antolín, F., Garcia, E., Vernesi, C., Fietta, A., Brinkkemper, O., ... Roldán-  
69 Ruiz, I. (2019). A Multifaceted Overview of Apple Tree Domestication. *Trends in Plant*  
70 *Science*, 24(8), 770–782. doi: <https://doi.org/10.1016/j.tplants.2019.05.007>

- 71 Cornille, Amandine, Feurtey, A., G lin, U., Ropars, J., Misvanderbrugge, K., Gladieux, P., &  
72 Giraud, T. (2015). Anthropogenic and natural drivers of gene flow in a temperate wild  
73 fruit tree: A basis for conservation and breeding programs in apples. *Evolutionary*  
74 *Applications*, 8(4), 373–384. doi: 10.1111/eva.12250
- 75 Cornille, Amandine, Giraud, T., Smulders, M. J. M., Rold n-Ruiz, I., & Gladieux, P. (2014). The  
76 domestication and evolutionary ecology of apples. *Trends in Genetics*, 30(2), 57–65. doi:  
77 10.1016/j.tig.2013.10.002
- 78 Cornille, Amandine, Gladieux, P., & Giraud, T. (2013a). Crop-to-wild gene flow and spatial  
79 genetic structure in the closest wild relatives of the cultivated apple. *Evolutionary*  
80 *Applications*, 6(5), 737–748. doi: 10.1111/eva.12059
- 81 Cornille, Amandine, Gladieux, P., & Giraud, T. (2013b). Crop-to-wild gene flow and spatial  
82 genetic structure in the closest wild relatives of the cultivated apple. *Evolutionary*  
83 *Applications*, 6(5), 737–748. doi: 10.1111/eva.12059
- 84 Cornille, Amandine, Gladieux, P., Smulders, M. J. M., Rold n-Ruiz, I., Laurens, F., Le Cam, B.,  
85 ... Giraud, T. (2012). New insight into the history of domesticated apple: Secondary  
86 contribution of the European wild apple to the genome of cultivated varieties. *PLoS*  
87 *Genetics*, 8(5). doi: 10.1371/journal.pgen.1002703
- 88 Decroocq, S., Cornille, A., Tricon, D., Babayeva, S., Chague, A., Eyquard, J. P., ... Decroocq, V.  
89 (2016). New insights into the history of domesticated and wild apricots and its  
90 contribution to Plum pox virus resistance. *Molecular Ecology*, 25(19), 4712–4729. doi:  
91 10.1111/mec.13772
- 92 Diez, C. M., Trujillo, I., Martinez-Urdiroz, N., Barranco, D., Rallo, L., Marfil, P., & Gaut, B. S.  
93 (2015). Olive domestication and diversification in the Mediterranean Basin. *New*  
94 *Phytologist*, 206(1), 436–447. doi: 10.1111/nph.13181

- 95 Duan, N., Bai, Y., Sun, H., Wang, N., Ma, Y., Li, M., ... Chen, X. (2017). Genome re-  
96 sequencing reveals the history of apple and supports a two-stage model for fruit  
97 enlargement. *Nature Communications*, 8(1). doi: 10.1038/s41467-017-00336-7
- 98 Earl, D. A. (2012). STRUCTURE HARVESTER: a website and program for visualizing  
99 STRUCTURE output and implementing the Evanno method. *Conservation Genetics*  
100 *Resources*, 4(2), 359–361.
- 101 Estoup, A. A., Raynal, L., Verdu, P., & Marin, J.-M. (2018). Model choice using Approximate  
102 Bayesian Computation and Random Forests: Analyses based on model grouping to make  
103 inferences about the genetic history of Pygmy human populations. *Journal de La Societe*  
104 *Française de Statistique*, 159(3), 167–190.
- 105 Evanno, G., Regnaut, S., & Goudet, J. (2005). Detecting the number of clusters of individuals  
106 using the software STRUCTURE: a simulation study. *Molecular Ecology*, 14(8), 2611–  
107 2620.
- 108 Excoffier, L., & Foll, M. (2011). fastsimcoal: A continuous-time coalescent simulator of genomic  
109 diversity under arbitrarily complex evolutionary scenarios. *Bioinformatics*, 27(9), 1332–  
110 1334. doi: 10.1093/bioinformatics/btr124
- 111 Excoffier, L., Foll, M., & Petit, R. J. (2009). Genetic Consequences of Range Expansions. *Annual*  
112 *Review of Ecology, Evolution, and Systematics*, 40(1), 481–501. doi:  
113 10.1146/annurev.ecolsys.39.110707.173414
- 114 Excoffier, L., & Lischer, H. E. L. (2010). Arlequin suite ver 3.5: A new series of programs to  
115 perform population genetics analyses under Linux and Windows. *Molecular Ecology*  
116 *Resources*, 10(3), 564–567. doi: 10.1111/j.1755-0998.2010.02847.x
- 117 Feurtey, A., Cornille, A., Shykoff, J. A., Snirc, A., & Giraud, T. (2017a). Crop to wild gene  
118 flow and its fitness consequences for a wild fruit tree: Towards a comprehensive

- 119 conservation strategy of the wild apple in Europe. *Evolutionary Applications*, *10*(2), 180–  
120 188. PMC (PMC5253423). doi: 10.1111/eva.12441
- 121 Feurtey, A., Cornille, A., Shykoff, J. A., Snirc, A., & Giraud, T. (2017b). Crop to wild gene  
122 flow and its fitness consequences for a wild fruit tree: Towards a comprehensive  
123 conservation strategy of the wild apple in Europe. *Evolutionary Applications*, *10*(2), 180–  
124 188. PMC (PMC5253423). doi: 10/f9wm3v
- 125 Fieldings, A. H., & Bell, J. F. (1997). A review of methods for the assessment of prediction errors  
126 in conservation presence/absence models. *Environmental Conservation*, *24*, 38–49.
- 127 Fischer, A., & Schmidt, M. (1938). Wilde Kern-und Steinobstarten, ihre Heimat und ihre  
128 Bedeutung für die Entstehung der Kultursorten und die Züchtung. *Der Züchter*, *10*(6),  
129 157–167.
- 130 Flowers, J. M., Hazzouri, K. M., Gros-Balthazard, M., Mo, Z., Koutroumpa, K., Perrakis, A., ...  
131 Purugganan, M. D. (2019). Cross-species hybridization and the origin of North African  
132 date palms. *Proceedings of the National Academy of Sciences of the United States of*  
133 *America*, *116*(5), 1651–1658. doi: 10.1073/pnas.1817453116
- 134 Forsline, P. L., Aldwinckle, H. S., Dickson, E. E., Luby, J. J., & Hokanson, S. C. (2003). *Of Wild*  
135 *Apples of Central Asia* (Vol. 29).
- 136 Fuller, D. Q. (2018). Long and attenuated: Comparative trends in the domestication of tree fruits.  
137 *Vegetation History and Archaeobotany*, *27*(1), 165–176. doi: 10.1007/s00334-017-0659-2
- 138 Gabrielian, E. T., & Zohary, D. (2004). Wild relatives of food crops native to Armenia and  
139 Nakhichevan. *Flora Mediterranea*, *14*, 5–80.
- 140 Gaut, B. S., Díez, C. M., & Morrell, P. L. (2015). Genomics and the Contrasting Dynamics of  
141 Annual and Perennial Domestication. *Trends in Genetics*, *31*(12), 709–719. doi:  
142 10.1016/j.tig.2015.10.002

- 143 Gharghani, A., Zamani, Z., Talaie, A., Fattahi, R., Hajnajari, H., Oraguzie, N. C., ... Gardiner, S.  
144 E. (2010). The Role of Iran (Persia) in Apple (*Malus × domestica* Borkh.) Domestication,  
145 Evolution and Migration via the Silk Trade Route. *Acta Horticulturae*, (859), 229–236.
- 146 Gharghani, Ali, Zamani, Z., Talaie, A., Oraguzie, N. C., Fatahi, R., Hajnajari, H., ... Gardiner, S.  
147 E. (2009). Genetic identity and relationships of Iranian apple (*Malus × domestica* Borkh.)  
148 cultivars and landraces, wild *Malus* species and representative old apple cultivars based  
149 on simple sequence repeat (SSR) marker analysis. *Genetic Resources and Crop Evolution*,  
150 56(6), 829–842.
- 151 Giesecke, T., Brewer, S., Finsinger, W., Leydet, M., & Bradshaw, R. H. W. (2017). Patterns and  
152 dynamics of European vegetation change over the last 15,000 years. *Journal of*  
153 *Biogeography*, 44(7), 1441–1456. doi: 10.1111/jbi.12974
- 154 Groppi, A., Liu, S., Cornille, A., Decroocq, S., & Decroocq, D. (2021). Population genomics of  
155 apricots unravels domestication history and adaptive events. *Nature Communications*, 12,  
156 3956.
- 157 Gros-Balthazard, M., & Flowers, J. M. (2021). A Brief History of the Origin of Domesticated  
158 Date Palms. In J. M. Al-Khayri, S. M. Jain, & D. V. Johnson (Eds.), *The Date Palm*  
159 *Genome, Vol. 1: Phylogeny, Biodiversity and Mapping* (pp. 55–74). Cham: Springer  
160 International Publishing. doi: 10.1007/978-3-030-73746-7\_3
- 161 Hardy, O. J., & Vekemans, X. (2002). SPAGeDi: A versatile computer program to analyse spatial  
162 genetic structure at the individual or population levels. *Molecular Ecology Notes*, 2(4),  
163 618–620.
- 164 Hewitt, G. M. (1990). Divergence and speciation as viewed from an insect hybrid zone.  
165 *Canadian Journal of Zoology*, 68(8), 1701–1715. doi: 10.1139/z90-251

- 166 Hewitt, G. M. (2004). Genetic consequences of climatic oscillations in the Quaternary.  
167 *Philosophical Transactions of the Royal Society of London. Series B: Biological Sciences*,  
168 359(1442), 183–195. doi: 10.1098/rstb.2003.1388
- 169 Hewitt, Godfrey M. (1996). Some genetic consequences of ice ages, and their role in divergence  
170 and speciation. *Biological Journal of the Linnean Society*, 58(3), 247–276. doi:  
171 10.1006/bijl.1996.0035
- 172 Höfer, M., Flachowsky, H., Hanke, M.-V., Seměnov, V., Šlāvas, A., Bandurko, I., ... Alexanian,  
173 S. (2013). Assessment of phenotypic variation of *Malus orientalis* in the North Caucasus  
174 region. *Genetic Resources and Crop Evolution*, 60(4), 1463–1477. doi: 10.1007/s10722-  
175 012-9935-2
- 176 Huson, D. H. (1998). SplitsTree: Analyzing and visualizing evolutionary data. *Bioinformatics*  
177 (*Oxford, England*), 14(1), 68–73.
- 178 Huson, D. H., & Scornavacca, C. (2012). Dendroscope 3: An interactive tool for rooted  
179 phylogenetic trees and networks. *Systematic Biology*, 61(6), 1061–1067.
- 180 Jezkova, T., Olah-Hemmings, V., & Riddle, B. R. (2011). Niche shifting in response to warming  
181 climate after the last glacial maximum: Inference from genetic data and niche assessments  
182 in the chisel-toothed kangaroo rat (*Dipodomys microps*). *Global Change Biology*, 17(11),  
183 3486–3502. doi: 10.1111/j.1365-2486.2011.02508.x
- 184 Jombart, T., & Ahmed, I. (2011). adegenet 1.3-1: New tools for the analysis of genome-wide  
185 SNP data. *Bioinformatics*, 27(21), 3070–3071. doi: 10.1093/bioinformatics/btr521
- 186 Langenfeld, W. T. (1991). Apple trees. *Morphological Evolution, Phylogeny, Geography and*  
187 *Systematics. Riga (Zinatne)*, 232.

- 188 Lascoux, M., Palmé, A. E., Cheddadi, R., & Latta, R. G. (2004). Impact of Ice Ages on the  
189 genetic structure of trees and shrubs. *Philosophical Transactions of the Royal Society B:  
190 Biological Sciences*, 359(1442), 197–207. doi: 10.1098/rstb.2003.1390
- 191 Leroy, B., Bellard, C., Dubos, N., Colliot, A., Vasseur, M., Courtial, C., ... Ysnel, F. (2014).  
192 Forecasted climate and land use changes, and protected areas: The contrasting case of  
193 spiders. *Diversity and Distributions*, 20(6), 686–697. doi: 10.1111/ddi.12191
- 194 Liang, Z., Duan, S., Sheng, J., Zhu, S., Ni, X., Shao, J., ... Dong, Y. (2019). Whole-genome  
195 resequencing of 472 *Vitis* accessions for grapevine diversity and demographic history  
196 analyses. *Nature Communications*, 10(1), 1190. doi: 10.1038/s41467-019-09135-8
- 197 Liu, S., Cornille, A., Decroocq, S., Tricon, D., Chague, A., Eyquard, J., ... Decroocq, V. (2019).  
198 The complex evolutionary history of apricots: Species divergence, gene flow and multiple  
199 domestication events. In *Molecular Ecology*. doi: 10.1111/mec.15296
- 200 Loiselle, B. A., Sork, V. L., Nason, J., & Graham, C. (1995). Spatial genetic structure of a  
201 tropical understory shrub, *Psychotria officinalis* (Rubiaceae). *American Journal of  
202 Botany*, 82(11), 1420–1425.
- 203 Mabry, M. E., Rowan, T. N., Pires, J. C., & Decker, J. E. (2021). Feralization: Confronting the  
204 Complexity of Domestication and Evolution. *Trends in Genetics*, 37(4), 302–305. doi:  
205 10.1016/j.tig.2021.01.005
- 206 Matsuoka, Y., Vigouroux, Y., Goodman, M. M., Sanchez G, J., Buckler, E., & Doebley, J.  
207 (2002). A single domestication for maize shown by multilocus microsatellite genotyping.  
208 *PNAS*, 99(9), 6080–6084. doi: 10.1073/pnas.052125199
- 209 Meyer, R. S., Duval, A. E., & Jensen, H. R. (2012). Patterns and processes in crop domestication:  
210 An historical review and quantitative analysis of 203 global food crops. *New Phytologist*,  
211 196(1), 29–48. doi: 10.1111/j.1469-8137.2012.04253.x

- 212 Monserud, R. A., & Leemans, R. (1992). Comparing global vegetation maps with the Kappa  
213 statistic. *Ecological Modelling*, 62(4), 275–293.
- 214 Myles, S., Boyko, A. R., Owens, C. L., Brown, P. J., Grassi, F., Aradhya, M. K., ... Buckler, E.  
215 S. (2011). Genetic structure and domestication history of the grape. *Proceedings of the*  
216 *National Academy of Sciences of the United States of America*, 108(9), 3530–3535. doi:  
217 10.1073/pnas.1009363108
- 218 Nakhutsrishvili, G., Zazanashvili, N., Batsatsashvili, K., & Montalvo, CS. (2015). Colchic and  
219 Hyrcanian forests of the Caucasus: Similarities, differences and conservation status. *Flora*  
220 *Mediterranea*, 25, 185–192.
- 221 Nei, M. (1987). *Molecular Evolutionary Genetics*. Columbia University Press. Retrieved from  
222 <https://books.google.es/books?id=UhRSsLkjxDgC>
- 223 Oddou-Muratorio, S., & Klein, E. K. (2008). Comparing direct vs. Indirect estimates of gene  
224 flow within a population of a scattered tree species. *Molecular Ecology*, 17(11), 2743–  
225 2754.
- 226 Omasheva, M. Y., Flachowsky, H., Ryabushkina, N. A., Pozharskiy, A. S., Galiakparov, N. N., &  
227 Hanke, M.-V. (2017). To what extent do wild apples in Kazakhstan retain their genetic  
228 integrity? *Tree Genetics & Genomes*, 13(3), 52. doi: 10.1007/s11295-017-1134-z
- 229 Parvizi, E., Keikhosravi, A., Naderloo, R., Solhjoui-Fard, S., Sheibak, F., & Schubart, C. D.  
230 (2019). Phylogeography of *Potamon ibericum* (Brachyura: Potamidae) identifies  
231 Quaternary glacial refugia within the Caucasus biodiversity hot spot. *Ecology and*  
232 *Evolution*, 9(8), 4749–4759. doi: 10.1002/ece3.5078
- 233 Patocchi, A., Fernández-Fernández, F., Evans, K., Gobbin, D., Rezzonico, F., Boudichevskaia,  
234 A., ... van de Weg, W. (2009). Development and test of 21 multiplex PCRs composed of  
235 SSRs spanning most of the apple genome. *Tree Genetics and Genomes*, 5(1), 211–223.

- 236 Patocchi, A., Frei, A., Frey, J. E., & Kellerhals, M. (2009). Towards improvement of marker  
237 assisted selection of apple scab resistant cultivars: *Venturia inaequalis* virulence surveys  
238 and standardization of molecular marker alleles associated with resistance genes.  
239 *Molecular Breeding*, 24(4), 337–347. doi: 10.1007/s11032-009-9295-6
- 240 Petit, R. J., Bialozyt, R., Garnier-Géré, P., & Hampe, A. (2004). Ecology and genetics of tree  
241 invasions: From recent introductions to Quaternary migrations. *Forest Ecology and*  
242 *Management*, 197(1–3), 117–137. doi: 10.1016/j.foreco.2004.05.009
- 243 Petit, R. J., & Hampe, A. (2006). Some Evolutionary Consequences of Being a Tree. *Annual*  
244 *Review of Ecology, Evolution, and Systematics*, 37(1), 187–214. doi:  
245 10.1146/annurev.ecolsys.37.091305.110215
- 246 Pritchard, J. K., Stephens, M., & Donnelly, P. (2000). Inference of population structure using  
247 multilocus genotype data. *Genetics*, 155(2), 945–959.
- 248 Pudlo, P., Marin, J.-M., Estoup, A., Cornuet, J.-M., Gautier, M., & Robert, C. P. (2016). Reliable  
249 ABC model choice via random forests. *Bioinformatics*, 32(6), 859–866. doi:  
250 10.1093/bioinformatics/btv684
- 251 Puechmaille, S. J. (2016). The program structure does not reliably recover the correct population  
252 structure when sampling is uneven: Subsampling and new estimators alleviate the  
253 problem. *Molecular Ecology Resources*, 16(3), 608–627. doi: 10.1111/1755-0998.12512
- 254 Qiu, J., Wang, L., Liu, M., Shen, Q., & Tang, J. (2011). An efficient and simple protocol for a  
255 PdCl<sub>2</sub>-ligandless and additive-free Suzuki coupling reaction of aryl bromides.  
256 *Tetrahedron Letters*, 52(48), 6489–6491. doi: 10.1016/j.tetlet.2011.09.115
- 257 Raymond, M., & Rousset, F. (1995). An exact test for population differentiation. *Evolution*,  
258 49(6), 1280–1283.

- 259 Raynal, L., Marin, J.-M., Pudlo, P., Ribatet, M., Robert, C. P., & Estoup, A. (2019). ABC random  
260 forests for Bayesian parameter inference. *Bioinformatics*, 35(10), 1720–1728. doi:  
261 10.1093/bioinformatics/bty867
- 262 Rechinger, K. H. (1964). Flora Iranica, Akademische Druck-und Verlagsanstalt Graz. *University*  
263 *of Tehran, Iran*, 549.
- 264 Rousset, F. (2008). genepop'007: A complete reimplementation of the genepop software for  
265 Windows and Linux. *Molecular Ecology Resources*, 8(1), 103–106.
- 266 Schmitt, T. (2007). Molecular biogeography of Europe: Pleistocene cycles and postglacial trends.  
267 *Frontiers in Zoology*, 4, 1–13. doi: 10.1186/1742-9994-4-11
- 268 Soofi, M., Ghoddousi, A., Zeppenfeld, T., Shokri, S., Soufi, M., Jafari, A., ... Waltert, M. (2018).  
269 Livestock grazing in protected areas and its effects on large mammals in the Hyrcanian  
270 forest, Iran. *Biological Conservation*, 217, 377–382. doi: 10.1016/j.biocon.2017.11.020
- 271 Spengler, R.N. (2019). *Fruit from the Sands: The Silk Road Origins of the Foods We Eat*.  
272 University of California Press. Retrieved from  
273 <https://books.google.fr/books?id=fr6SDwAAQBAJ>
- 274 Spengler, Robert N., Chang, C., & Tourtellotte, P. A. (2013). Agricultural production in the  
275 Central Asian mountains: Tuzusai, Kazakhstan (410–150 b.c.). *Journal of Field*  
276 *Archaeology*, 38(1), 68–85. doi: 10.1179/0093469012Z.000000000037
- 277 Spengler, Robert Nicholas. (2019). Origins of the Apple: The Role of Megafaunal Mutualism in  
278 the Domestication of Malus and Rosaceous Trees. *Frontiers in Plant Science*, 10. doi:  
279 10.3389/fpls.2019.00617
- 280 Szpiech, Z. A., Jakobsson, M., & Rosenberg, N. A. (2008). ADZE: a rarefaction approach for  
281 counting alleles private to combinations of populations. *Bioinformatics*, 24(21), 2498–  
282 2504.

- 283 Tardío, J., Arnal, A., & Lázaro, A. (2020). Ethnobotany of the crab apple tree (*Malus sylvestris*  
284 (L.) Mill., Rosaceae) in Spain. *Genetic Resources and Crop Evolution*. doi:  
285 10.1007/s10722-020-01026-y
- 286 Teixeira, J. C., & Huber, C. D. (2021). The inflated significance of neutral genetic diversity in  
287 conservation genetics. *Proceedings of the National Academy of Sciences*, 118(10),  
288 e2015096118. doi: 10.1073/pnas.2015096118
- 289 Thuiller, W., Georges, D., Engler, R., & Breiner, F. (2016). *Biomod2: Ensemble platform for*  
290 *species distribution modeling. R package version 3.3-7.*
- 291 Tian, F., Li, B., Ji, B., Zhang, G., & Luo, Y. (2009). Identification and structure-activity  
292 relationship of gallotannins separated from *Galla chinensis*. *LWT - Food Science and*  
293 *Technology*, 42(7), 1289–1295. doi: 10.1016/j.lwt.2009.03.004
- 294 Vavilov, N. I. (1926). Studies on the origin of cultivated plants. *Trudy Byuro. Prikl. Bot.*, 16,  
295 139–245.
- 296 Vavilov, N. I. (1992). *Origin and geography of cultivated plants*. Cambridge: Cambridge  
297 University Press. CABDirect.
- 298 Vekemans, X., & Hardy, O. J. (2004a). New insights from fine-scale spatial genetic structure  
299 analyses in plant populations. *Molecular Ecology*, 13(4), 921–935. doi: 10.1046/j.1365-  
300 294X.2004.02076.x
- 301 Vekemans, X., & Hardy, O. J. (2004b). New insights from fine-scale spatial genetic structure  
302 analyses in plant populations. *Molecular Ecology*, 13(4), 921–935.
- 303 Volk, G. M., & Cornille, A. (2019). Genetic Diversity and Domestication History in *Pyrus*. In  
304 *The Pear Genome* (pp. 51–62). Springer.
- 305 Volk, G. M., Richards, C. M., Reilley, A. A., Henk, A. D., Reeves, P. A., Forsline, P. L., &  
306 Aldwinckle, H. S. (2008). Genetic diversity and disease resistance of wild *Malus*

- 307 orientalis from Turkey and Southern Russia. *Journal of the American Society for*  
308 *Horticultural Science*, 133(3), 383–389.
- 309 Vouillamoze, J. F., McGovern, P. E., Ergul, A., Söylemezoğlu, G., Tevzadze, G., Meredith, C. P.,  
310 & Grando, M. S. (2006). Genetic characterization and relationships of traditional grape  
311 cultivars from Transcaucasia and Anatolia. *Plant Genetic Resources*, 4(2), 144–158. doi:  
312 10.1079/pgr2006114
- 313 Wegmann, D., Leuenberger, C., Neuenschwander, S., & Excoffier, L. (2010). ABCtoolbox: A  
314 versatile toolkit for approximate Bayesian computations. *BMC Bioinformatics*, 11(1), 116.  
315 doi: 10.1186/1471-2105-11-116
- 316 Wu, J., Wang, Y., Xu, J., Korban, S. S., Fei, Z., Tao, S., ... Zhang, S. (2018). Diversification and  
317 independent domestication of Asian and European pears. *Genome Biology*, 19(1), 77. doi:  
318 10.1186/s13059-018-1452-y
- 319 Yousefzadeh, H., Hosseinzadeh Colagar, A., Tabari, M., Sattarian, A., & Assadi, M. (2012).  
320 Utility of ITS region sequence and structure for molecular identification of *Tilia* species  
321 from Hyrcanian forests, Iran. *Plant Systematics and Evolution*, 298(5), 947–961. doi:  
322 10.1007/s00606-012-0604-x
- 323 Zazanashvili, N., Sanadiradze, G., Garforth, M., Bitsadze, M., Manvelyan, K., Askerov, E., ...  
324 Devranoğlu Tavşel, S. (2020). *Ecoregional Conservation Plan (ECP) For The Caucasus*  
325 *2020 Edition*. WWF, KfW, Tbilisi.
- 326 Zeng, G., Zhang, J., Chen, Y., Yu, Z., Yu, M., Li, H., ... Hu, C. (2011). Relative contributions of  
327 archaea and bacteria to microbial ammonia oxidation differ under different conditions  
328 during agricultural waste composting. *Bioresour Technol*, 102(19), 9026–9032. doi:  
329 10.1016/j.biortech.2011.07.076

- 330 Zhang, H., Mittal, N., Leamy, L. J., Barazani, O., & Song, B. H. (2017). Back into the wild—  
331 Apply untapped genetic diversity of wild relatives for crop improvement. *Evolutionary*  
332 *Applications*, 10(1), 5–24. doi: 10.1111/eva.12434
- 333 Zhang, H.-X., Li, H.-Y., & Li, Y.-X. (2018). Identifying evolutionarily significant units for  
334 conservation of the endangered *Malus sieversii* using genome-wide RADseq data. *Nordic*  
335 *Journal of Botany*, 36(7), e01733. doi: 10.1111/njb.01733
- 336







Group comparison:  
 Best group of scenarios

Number of votes (and %):

Posterior probability:

Prior error rate:

Group comparison (only 'WP-after scenarios):

Best scenario:

Number of votes (and %):

Posterior probability:

Prior error rate:
